# Supplementary material for: Palladium/copper-catalyzed decarbonylative heteroarylation of amides via C–N bond activation
Source: Royal Society of Chemistry journal article supplement (doi:10.1039/c9qo00106a), 2019-01-01

# *Supporting Information*

## **Palladium/Copper-Catalyzed Decarbonylative Heteroarylation of Amides via C-N Bond Activation**

Ping-Xin Zhou,<sup>\*a</sup> Shuai Shi,<sup>b</sup> Jia Wang,<sup>a</sup> Yalei Zhang,<sup>a</sup> Changzheng Li<sup>\*a</sup> and Chunpo Ge<sup>\*a</sup>

<sup>a</sup> *School of Basic Medical Sciences, Xinxiang Medical University, Xinxiang, 453003, China*

<sup>b</sup> *School of Foreign Language, Xinxiang Medical University, Xinxiang, 453003, China*

*E-mail: zhoupingxin518@yahoo.com, changzhengli@xxmu.edu.cn and gecp1987@xxmu.edu.cn*

### **Table of Contents**

|   |                                                                      |   |
|---|----------------------------------------------------------------------|---|
| 1 | General remarks                                                      | 2 |
| 2 | General procedure for the preparation of the products <b>3</b>       | 2 |
| 3 | Spectral data of compound <b>3</b>                                   | 2 |
| 4 | References                                                           | 8 |
| 5 | <sup>1</sup> H and <sup>13</sup> C NMR spectra for compound <b>3</b> | 9 |

## 1. General remarks

The desired product was purified by flash column chromatography, silica gel (200~300 mesh).  $^1\text{H}$  NMR spectra and  $^{13}\text{C}$  NMR spectra were recorded on 400 MHz in  $\text{CDCl}_3$  and TMS as internal standard. All products were further characterized by HRMS (high resolution mass spectra). Copies of their  $^1\text{H}$  NMR and  $^{13}\text{C}$  NMR spectra are provided. 1,4-dioxane were dried over sodium with benzophenone-ketyl intermediate as indicator. Commercially available reagents and solvents were used without further purification. *N*-glutarimide amide **1**<sup>1</sup> and heteroarenes **2**<sup>2</sup> were synthesized according to the literature procedure. For **3-3**, **3-5**, **3-8**, **3-9**, **3-10**, **3-11** and **3-30** are new compounds. For others **3** are known compounds.<sup>3</sup>

## 2. General procedure for the preparation of the products **3**

An oven-dried Schlenk tube under a nitrogen atmosphere was charged with **1** (0.4 mmol, 2.0 equiv), **2** (0.2 mmol, 1.0 equiv),  $\text{Pd}(\text{PPh}_3)_2\text{Cl}_2$  (10 mol %), dppe (20 mol %),  $\text{CuBr}$  (20 mol %),  $\text{Na}_2\text{CO}_3$  (0.26 mmol, 1.3 equiv), 1,4-dioxane (0.5 mL). The mixture was stirred at room temperature for 20 minutes and then stirred at 160 °C for 24 h. The resulting mixture was cooled to room temperature and filtered through Celite eluting with EtOAc. The volatiles were evaporated under reduced pressure and the residue was purified by silica gel flash chromatography to afford the desired products **3**.

## 3. Spectral data of compound **3**

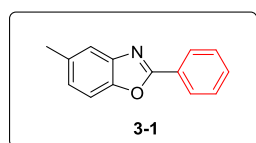

**5-methyl-2-phenylbenzo[d]oxazole: white solid;**  $^1\text{H}$  NMR (500 MHz,  $\text{CDCl}_3$ )  $\delta$ : 8.28-8.26 (m, 2H), 7.59 (s, 1H), 7.59-7.54 (m, 3H), 7.47 (d,  $J = 8.5$  Hz, 1H), 7.19-7.17 (m, 1H), 2.51 (s, 3H);  $^{13}\text{C}$  NMR (100 MHz,  $\text{CDCl}_3$ )  $\delta$ : 163.09, 148.96, 142.23, 134.39, 131.38, 128.86, 127.53, 127.27, 126.22, 119.88, 109.93, 21.53; HRMS (ESI)  $m/z$ : calcd for  $\text{C}_{14}\text{H}_{12}\text{NO}$ ,  $[\text{M}+\text{H}]^+$ : 210.0841; Found: 210.0914.

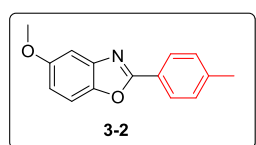

**5-methoxy-2-(p-tolyl)benzo[d]oxazole: white solid; NMR yield; HRMS (ESI) m/z: calcd for C<sub>15</sub>H<sub>14</sub>NO<sub>2</sub>, [M+H]<sup>+</sup>: 240.0946; Found: 240.1021.**

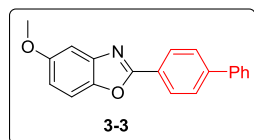

**2-([1,1'-biphenyl]-4-yl)-5-methoxybenzo[d]oxazole: white solid; <sup>1</sup>H NMR (500 MHz, CDCl<sub>3</sub>) δ: 8.33-8.31 (m, 2H), 7.79-7.77 (m, 2H), 7.70-7.68 (m, 2H), 7.53-7.49 (m, 3H), 7.46-7.43 (m, 1H), 7.30 (d, *J* = 2.5 Hz, 1H), 7.00-6.98 (m, 1H), 3.91 (s, 3H); <sup>13</sup>C NMR (100 MHz, CDCl<sub>3</sub>) δ: 163.65, 157.39, 145.44, 144.06, 143.01, 139.98, 128.93, 128.03, 127.92, 127.52, 127.14, 126.03, 113.68, 110.70, 102.82, 55.93; HRMS (ESI) m/z: calcd for C<sub>20</sub>H<sub>16</sub>NO<sub>2</sub>, [M+H]<sup>+</sup>: 302.1103; Found: 302.1176.**

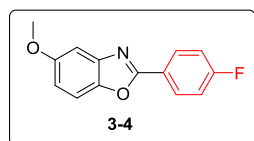

**2-(4-fluorophenyl)-5-methoxybenzo[d]oxazole: yellow solid; <sup>1</sup>H NMR (500 MHz, CDCl<sub>3</sub>) δ: 8.25-8.22 (m, 2H), 7.54 (d, *J* = 2.0 Hz, 1H), 7.47-7.45 (m, 1H), 7.26-7.20 (m, 2H), 6.98-6.96 (m, 1H), 3.89 (s, 3H); <sup>13</sup>C NMR (100 MHz, CDCl<sub>3</sub>) δ: 165.95, 163.43, 162.86, 157.40, 145.37, 142.84, 131.38, 129.68, 129.60, 128.87, 127.45, 123.54, 116.24, 116.02, 113.68, 110.67, 102.81, 55.90; HRMS (ESI) m/z: calcd for C<sub>14</sub>H<sub>11</sub>FNO<sub>2</sub>, [M+H]<sup>+</sup>: 244.0696; Found: 244.0770.**

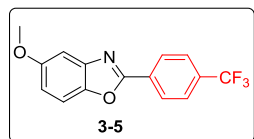

**5-methoxy-2-(4-(trifluoromethyl)phenyl)benzo[d]oxazole: white solid; <sup>1</sup>H NMR (500 MHz, CDCl<sub>3</sub>) δ: 8.35 (d, *J* = 8.0 Hz, 2H), 7.80 (d, *J* = 3.0 Hz, 2H), 7.50 (d, *J* = 9.0 Hz, 1H), 7.29-7.28 (m, 1H), 7.02 (dd, *J* = 9.0, 2.0 Hz, 1H), 3.90 (s, 3H); <sup>13</sup>C NMR (100 MHz, CDCl<sub>3</sub>) δ: 162.14, 157.59, 145.49, 142.71, 132.96, 130.48, 127.66, 125.93, 125.90, 125.86, 125.82, 122.38, 114.63, 110.94, 102.90, 55.91; HRMS (ESI) m/z: calcd for C<sub>15</sub>H<sub>11</sub>F<sub>3</sub>NO<sub>2</sub>, [M+H]<sup>+</sup>: 294.0664; Found: 294.0734.**

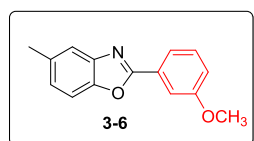

**2-(3-methoxyphenyl)-5-methylbenzo[d]oxazole: white solid; <sup>1</sup>H NMR (500 MHz, CDCl<sub>3</sub>) δ: 7.86 (d, *J* = 7.5 Hz, 1H), 7.80-7.79 (m, 1H), 7.59 (s, 1H), 7.49-7.43 (m, 2H), 7.20-7.18 (m, 1H), 7.11-7.09 (m, 1H), 3.94 (s, 3H), 2.51 (s, 3H); <sup>13</sup>C NMR (100 MHz, CDCl<sub>3</sub>) δ: 163.00, 159.88, 148.95, 142.21, 134.40, 129.95, 128.46, 126.28, 120.02, 119.88, 118.20, 111.75, 109.93, 55.50, 21.54; HRMS (ESI) m/z: calcd for C<sub>15</sub>H<sub>14</sub>NO<sub>2</sub>, [M+H]<sup>+</sup>: 240.0946; Found: 240.1020.**

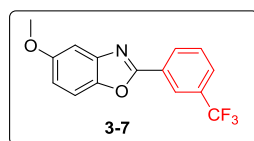

**5-methoxy-2-(3-(trifluoromethyl)phenyl)benzo[d]oxazole: white solid;**  $^1\text{H}$  NMR (500 MHz,  $\text{CDCl}_3$ )  $\delta$ : 8.52 (d,  $J = 2.5$  Hz, 1H), 8.43-8.41 (m, 1H), 7.80 (d,  $J = 8.0$  Hz, 1H), 7.69-7.67 (m, 1H), 7.52-7.50 (m, 1H), 7.29 (t,  $J = 2.5$  Hz, 1H), 7.03-7.00 (m, 1H), 3.90 (s, 3H);  $^{13}\text{C}$  NMR (100 MHz,  $\text{CDCl}_3$ )  $\delta$ : 162.18, 157.59, 145.43, 142.67, 131.38, 130.42, 129.50, 128.87, 128.09, 127.82, 127.78, 127.74, 127.71, 127.45, 124.34, 114.46, 110.91, 102.89, 55.91; HRMS (ESI)  $m/z$ : calcd for  $\text{C}_{15}\text{H}_{11}\text{F}_3\text{NO}_2$ ,  $[\text{M}+\text{H}]^+$ : 294.0664; Found: 294.0733.

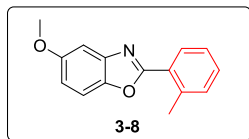

**5-methoxy-2-(o-tolyl)benzo[d]oxazole: white solid;**  $^1\text{H}$  NMR (500 MHz,  $\text{CDCl}_3$ )  $\delta$ : 8.20-8.18 (m, 1H), 7.49 (d,  $J = 9.0$  Hz, 1H), 7.46-7.41 (m, 1H), 7.37 (d,  $J = 7.0$  Hz, 2H), 7.33 (d,  $J = 3.0$  Hz, 1H), 7.00-6.98 (m, 1H), 3.91 (s, 3H), 2.84 (s, 3H);  $^{13}\text{C}$  NMR (100 MHz,  $\text{CDCl}_3$ )  $\delta$ : 164.18, 157.23, 144.91, 142.89, 138.68, 131.77, 130.80, 129.79, 126.28, 126.04, 113.73, 110.61, 102.85, 55.94, 22.26; HRMS (ESI)  $m/z$ : calcd for  $\text{C}_{15}\text{H}_{14}\text{NO}_2$ ,  $[\text{M}+\text{H}]^+$ : 240.0946; Found: 240.1019.

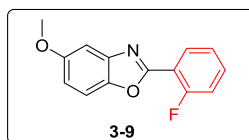

**2-(2-fluorophenyl)-5-methoxybenzo[d]oxazole: white solid;**  $^1\text{H}$  NMR (500 MHz,  $\text{CDCl}_3$ )  $\delta$ : 8.25-8.22 (m, 1H), 7.55-7.51 (m, 2H), 7.34-7.27 (m, 3H), 7.02-6.99 (m, 1H), 3.90 (s, 3H);  $^{13}\text{C}$  NMR (100 MHz,  $\text{CDCl}_3$ )  $\delta$ : 161.98, 160.14, 160.08, 159.40, 157.42, 145.11, 145.09, 142.58, 133.00, 132.91, 130.36, 130.35, 124.44, 116.95, 114.30, 110.83, 102.93, 55.90; HRMS (ESI)  $m/z$ : calcd for  $\text{C}_{14}\text{H}_{11}\text{FNO}_2$ ,  $[\text{M}+\text{H}]^+$ : 244.0696; Found: 244.0764.

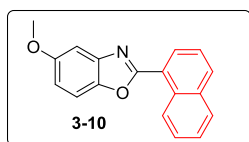

**5-methoxy-2-(naphthalen-1-yl)benzo[d]oxazole: white solid;**  $^1\text{H}$  NMR (500 MHz,  $\text{CDCl}_3$ )  $\delta$ : 9.50 (d,  $J = 8.5$  Hz, 1H), 8.43 (d,  $J = 7.5$  Hz, 1H), 8.05 (d,  $J = 8.0$  Hz, 1H), 7.96 (d,  $J = 8.0$  Hz, 1H), 7.64 (t,  $J = 3.0$  Hz, 1H), 7.61 (d,  $J = 5.0$  Hz, 2H), 7.55 (d,  $J = 8.5$  Hz, 1H), 7.41-7.40 (m, 1H), 7.04-7.02 (m, 1H), 3.94 (s, 3H);  $^{13}\text{C}$  NMR (101 MHz,  $\text{CDCl}_3$ )  $\delta$ : 163.59, 157.33, 144.82, 143.11, 133.95, 132.19, 130.61, 129.16, 128.66, 127.85, 126.41, 126.29, 124.94, 123.69, 113.98, 110.64, 103.00, 55.97; HRMS (ESI)  $m/z$ : calcd for  $\text{C}_{18}\text{H}_{14}\text{NO}_2$ ,  $[\text{M}+\text{H}]^+$ : 276.0946; Found: 276.1017.

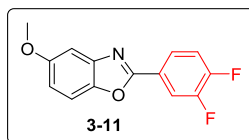

**2-(3,4-difluorophenyl)-5-methoxybenzo[d]oxazole: white solid;**  $^1\text{H}$  NMR (500 MHz,  $\text{CDCl}_3$ )  $\delta$ : 8.07-8.03 (m, 1H), 8.01-7.98 (m, 1H), 7.47 (d,  $J = 9.0$  Hz, 1H), 7.35-7.25 (m, 2H), 7.00-6.98 (m, 1H), 3.90 (s, 3H);  $^{13}\text{C}$  NMR (100 MHz,  $\text{CDCl}_3$ )  $\delta$ : 161.69, 157.53, 153.63, 151.73, 151.22, 149.24, 145.43, 142.71, 131.38, 128.87, 127.44, 124.07, 117.95, 116.58, 114.18, 110.80, 102.84, 55.91; HRMS (ESI)  $m/z$ : calcd for  $\text{C}_{14}\text{H}_{10}\text{F}_2\text{NO}_2$ ,  $[\text{M}+\text{H}]^+$ : 262.0601; Found: 262.0675.

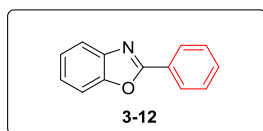

**2-phenylbenzo[d]oxazole: white solid;**  $^1\text{H}$  NMR (500 MHz,  $\text{CDCl}_3$ )  $\delta$ : 8.31-8.29 (m, 2H), 7.83-7.81 (m, 1H), 7.63-7.61 (m, 1H), 7.58-7.56 (m, 3H), 7.40-7.38 (m, 2H);  $^{13}\text{C}$  NMR (100 MHz,  $\text{CDCl}_3$ )  $\delta$  163.03, 150.73, 142.06, 131.53, 128.91, 127.61, 127.13, 125.11, 124.58, 120.00, 110.59; HRMS (ESI)  $m/z$ : calcd for  $\text{C}_{13}\text{H}_{10}\text{NO}$ ,  $[\text{M}+\text{H}]^+$ : 196.0684; Found: 196.0754.

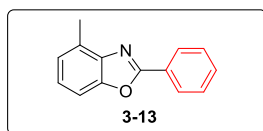

**4-methyl-2-phenylbenzo[d]oxazole: white solid;**  $^1\text{H}$  NMR (500 MHz,  $\text{CDCl}_3$ )  $\delta$ : 8.32-8.30 (m, 2H), 7.56-7.55 (m, 3H), 7.45-7.43 (m, 1H), 7.29-7.26 (m, 1H), 7.19-7.17 (m, 1H), 2.72 (s, 3H);  $^{13}\text{C}$  NMR (125 MHz,  $\text{CDCl}_3$ )  $\delta$ : 162.28, 150.55, 141.45, 131.28, 130.61, 128.84, 127.61, 127.45, 125.05, 124.75, 107.85, 16.61; HRMS (ESI)  $m/z$ : calcd for  $\text{C}_{14}\text{H}_{12}\text{NO}$ ,  $[\text{M}+\text{H}]^+$ : 210.0841; Found: 210.0917.

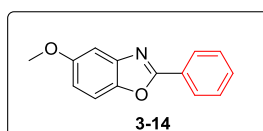

**5-methoxy-2-phenylbenzo[d]oxazole: white solid;**  $^1\text{H}$  NMR (500 MHz,  $\text{CDCl}_3$ )  $\delta$ : 8.26-8.25 (m, 2H), 7.55-7.54 (m, 3H), 7.48 (d,  $J = 8.5$  Hz, 1H), 7.29 (d,  $J = 3.0$  Hz, 1H), 6.97 (dd,  $J = 9.0, 2.0$  Hz, 1H), 3.90 (s, 3H);  $^{13}\text{C}$  NMR (125 MHz,  $\text{CDCl}_3$ )  $\delta$ : 163.79, 157.40, 145.42, 142.93, 131.41, 128.89, 127.49, 127.27, 113.72, 110.72, 102.88, 55.94; HRMS (ESI)  $m/z$ : calcd for  $\text{C}_{14}\text{H}_{12}\text{NO}_2$ ,  $[\text{M}+\text{H}]^+$ : 226.0790; Found: 226.0865.

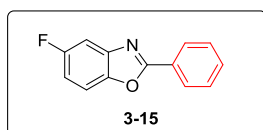

**5-fluoro-2-phenylbenzo[d]oxazole: white solid;**  $^1\text{H}$  NMR (500 MHz,  $\text{CDCl}_3$ )  $\delta$ : 8.27-8.26 (m, 2H), 7.59-7.53 (m, 4H), 7.49-7.47 (m, 1H), 7.13-7.09 (m, 1H);  $^{13}\text{C}$  NMR (100 MHz,  $\text{CDCl}_3$ )  $\delta$ : 164.75, 161.32, 158.93, 147.07, 142.96, 131.82, 128.96, 127.66, 126.82, 112.83, 112.57, 110.88, 110.78, 106.52, 106.27; HRMS (ESI)  $m/z$ : calcd for  $\text{C}_{13}\text{H}_9\text{FNO}$ ,  $[\text{M}+\text{H}]^+$ : 214.0590; Found: 214.0662.

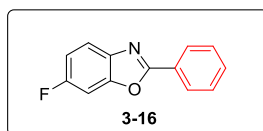

**6-fluoro-2-phenylbenzo[d]oxazole: white solid;**  $^1\text{H}$  NMR (500 MHz,  $\text{CDCl}_3$ )  $\delta$ : 8.25-8.23 (m, 2H), 7.72 (dd,  $J = 8.5, 5.0$  Hz, 1H), 7.57-7.55 (m, 3H), 7.33 (dd,  $J = 8.0, 2.5$  Hz, 1H), 7.15-7.11 (m, 1H);  $^{13}\text{C}$  NMR (100 MHz,  $\text{CDCl}_3$ )  $\delta$ : 163.67, 161.86, 159.43, 150.75, 138.37, 131.60, 128.95, 127.46, 126.84, 120.28, 120.18, 112.66, 112.42, 98.81, 98.53; HRMS (ESI)  $m/z$ : calcd for  $\text{C}_{13}\text{H}_9\text{FNO}$ ,  $[\text{M}+\text{H}]^+$ : 214.0590; Found: 214.0664.

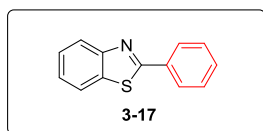

**2-phenylbenzo[d]thiazole: white solid;**  $^1\text{H}$  NMR (500 MHz,  $\text{CDCl}_3$ )  $\delta$ : 8.14-8.11 (m, 3H), 7.95-7.93 (m, 1H), 7.55-7.52 (m, 4H), 7.44-7.41 (m, 1H);  $^{13}\text{C}$  NMR (100 MHz,  $\text{CDCl}_3$ )  $\delta$ : 168.07, 154.11, 135.04, 133.59, 130.97, 129.02, 127.55, 126.32, 125.19, 123.22, 121.62; HRMS (ESI)  $m/z$ : calcd for  $\text{C}_{13}\text{H}_{10}\text{NS}$ ,  $[\text{M}+\text{H}]^+$ : 212.0456; Found: 212.0529.

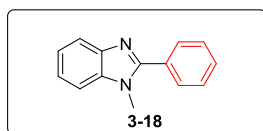

**1-methyl-2-phenyl-1H-benzo[d]imidazole: white solid;**  $^1\text{H}$  NMR (500 MHz,  $\text{CDCl}_3$ )  $\delta$ : 7.88-7.86 (m, 1H), 7.79 (dd,  $J = 7.5, 2.0$  Hz, 2H), 7.57-7.53 (m, 3H), 7.42-7.40 (m, 1H), 7.36-7.34 (m, 2H), 3.86 (s, 3H);  $^{13}\text{C}$  NMR (100 MHz,  $\text{CDCl}_3$ )  $\delta$ : 153.75, 142.91, 136.55, 130.18, 129.72, 129.43, 128.67, 122.76, 122.43, 119.81, 109.63, 31.68; HRMS (ESI)  $m/z$ : calcd for  $\text{C}_{14}\text{H}_{13}\text{N}_2$ ,  $[\text{M}+\text{H}]^+$ : 209.1000; Found: 209.1070.

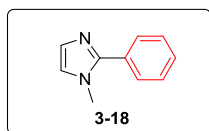

**1-methyl-2-phenyl-1H-imidazole: white solid; NMR yield;** HRMS (ESI)  $m/z$ : calcd for  $\text{C}_{10}\text{H}_{11}\text{N}_2$ ,  $[\text{M}+\text{H}]^+$ : 159.0844; Found: 159.0917.

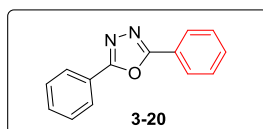

**2,5-diphenyl-1,3,4-oxadiazole: white solid;**  $^1\text{H}$  NMR (500 MHz,  $\text{CDCl}_3$ )  $\delta$ : 8.19-8.17 (m, 4H), 7.59-7.57 (m, 6H);  $^{13}\text{C}$  NMR (100 MHz,  $\text{CDCl}_3$ )  $\delta$ : 164.58, 131.72, 129.07, 126.93, 123.91; HRMS (ESI)  $m/z$ : calcd for  $\text{C}_{14}\text{H}_{10}\text{N}_2\text{ONa}$ ,  $[\text{M}+\text{Na}]^+$ : 245.0793; Found: 245.0688.

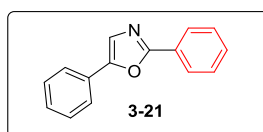

**2,5-diphenyloxazole: white solid;**  $^1\text{H}$  NMR (500 MHz,  $\text{CDCl}_3$ )  $\delta$ : 8.16-8.14 (m, 2H), 7.77-7.75 (m, 2H), 7.54-7.47 (m, 6H), 7.39-7.37 (m, 1H);  $^{13}\text{C}$  NMR (100 MHz,  $\text{CDCl}_3$ )  $\delta$ : 161.13, 151.24, 130.33, 128.93, 128.82, 128.44, 127.99, 127.42, 126.27, 124.18, 123.43; HRMS (ESI)  $m/z$ : calcd for  $\text{C}_{15}\text{H}_{12}\text{NO}$ ,  $[\text{M}+\text{H}]^+$ : 222.0841; Found: 222.0913.

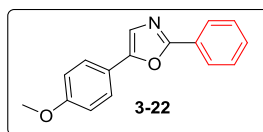

**5-(4-methoxyphenyl)-2-phenyloxazole: yellow solid;**  $^1\text{H}$  NMR (500 MHz,  $\text{CDCl}_3$ )  $\delta$ : 8.14-8.12 (m, 2H), 7.70-7.68 (m, 2H), 7.51-7.48 (m, 3H), 7.36 (s, 1H), 7.02-7.00 (m, 2H), 3.89 (s, 3H);  $^{13}\text{C}$

NMR (125 MHz, CDCl<sub>3</sub>)  $\delta$ : 160.56, 159.83, 151.33, 130.13, 128.80, 127.58, 126.15, 125.76, 121.95, 120.88, 114.42, 55.39; HRMS (ESI)  $m/z$ : calcd for C<sub>16</sub>H<sub>14</sub>NO<sub>2</sub>, [M+H]<sup>+</sup>: 252.0946; Found: 252.1017.

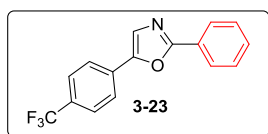

**2-phenyl-5-(4-(trifluoromethyl)phenyl)oxazole: white solid;** <sup>1</sup>H NMR (500 MHz, CDCl<sub>3</sub>)  $\delta$ : 8.15-8.13 (m, 2H), 7.84-7.82 (m, 2H), 7.72-7.71 (m, 2H), 7.57 (s, 1H), 7.53-7.52 (m, 3H); <sup>13</sup>C NMR (125 MHz, CDCl<sub>3</sub>)  $\delta$ : 161.98, 149.82, 131.20, 130.75, 130.18, 128.90, 127.07, 126.47, 126.03, 126.00, 125.97, 125.93, 125.23, 124.20; HRMS (ESI)  $m/z$ : calcd for C<sub>16</sub>H<sub>11</sub>F<sub>3</sub>NO, [M+H]<sup>+</sup>: 290.0714; Found: 290.0788.

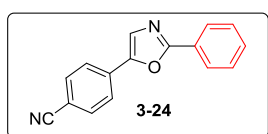

**5-(4-isocyanophenyl)-2-phenyloxazole: white solid;** <sup>1</sup>H NMR (500 MHz, CDCl<sub>3</sub>)  $\delta$ : 8.14-8.12 (m, 2H), 7.83-7.81 (m, 2H), 7.74 (d,  $J$  = 8.0 Hz, 2H), 7.61 (s, 1H), 7.53-7.52 (m, 3H); <sup>13</sup>C NMR (100 MHz, CDCl<sub>3</sub>)  $\delta$ : 162.38, 149.32, 132.80, 131.88, 130.97, 128.94, 126.81, 126.52, 126.24, 124.32, 118.57, 111.46; HRMS (ESI)  $m/z$ : calcd for C<sub>16</sub>H<sub>11</sub>N<sub>2</sub>O, [M+H]<sup>+</sup>: 247.0793; Found: 247.0867.

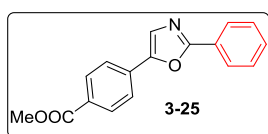

**methyl 4-(2-phenyloxazol-5-yl)benzoate: white solid;** <sup>1</sup>H NMR (500 MHz, CDCl<sub>3</sub>)  $\delta$ : 8.16-8.12 (m, 4H), 7.81-7.79 (m, 2H), 7.58 (d,  $J$  = 1.5 Hz, 1H), 7.54-7.51 (m, 3H), 3.97 (s, 3H); <sup>13</sup>C NMR (125 MHz, CDCl<sub>3</sub>)  $\delta$ : 166.50, 161.96, 150.24, 131.95, 130.70, 130.30, 129.61, 128.89, 127.11, 126.47, 125.43, 123.82, 52.24; HRMS (ESI)  $m/z$ : calcd for C<sub>17</sub>H<sub>14</sub>NO<sub>3</sub>, [M+H]<sup>+</sup>: 280.0875; Found: 280.0970

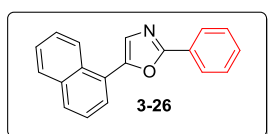

**5-(naphthalen-1-yl)-2-phenyloxazole: white solid;** <sup>1</sup>H NMR (500 MHz, CDCl<sub>3</sub>)  $\delta$ : 8.42-8.40 (m, 1H), 8.22-8.20 (m, 2H), 7.97-7.93 (m, 2H), 7.88-7.86 (m, 1H), 7.64-7.53 (m, 7H); <sup>13</sup>C NMR (100 MHz, CDCl<sub>3</sub>)  $\delta$ : 161.53, 150.52, 133.90, 130.42, 130.10, 129.58, 128.89, 128.77, 127.49, 127.12, 126.81, 126.42, 126.36, 126.27, 125.37, 125.33, 124.91; HRMS (ESI)  $m/z$ : calcd for C<sub>19</sub>H<sub>14</sub>NO, [M+H]<sup>+</sup>: 272.0997; Found: 272.1072.

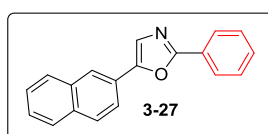

**5-(naphthalen-2-yl)-2-phenyloxazole: white solid;**  $^1\text{H}$  NMR (500 MHz,  $\text{CDCl}_3$ )  $\delta$ : 8.23-8.20 (m, 3H), 7.95-7.92 (m, 2H), 7.89-7.87 (m, 1H), 7.81 (dd,  $J = 8.5, 2.0$  Hz, 1H), 7.59-7.52 (m, 6H);  $^{13}\text{C}$  NMR (125 MHz,  $\text{CDCl}_3$ )  $\delta$ : 161.32, 151.36, 133.38, 133.09, 130.42, 128.85, 128.76, 128.21, 127.86, 127.38, 126.82, 126.52, 126.36, 125.25, 123.93, 122.92, 122.06; HRMS (ESI)  $m/z$ : calcd for  $\text{C}_{19}\text{H}_{14}\text{NO}$ ,  $[\text{M}+\text{H}]^+$ : 272.0997; Found: 272.1072

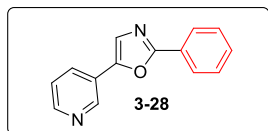

**2-phenyl-5-(pyridin-3-yl)oxazole: white solid;**  $^1\text{H}$  NMR (500 MHz,  $\text{CDCl}_3$ )  $\delta$ : 8.68-8.66 (m, 1H), 8.18-8.16 (m, 2H), 7.84-7.77 (m, 3H), 7.52-7.50 (m, 3H), 7.26-7.24 (m, 1H);  $^{13}\text{C}$  NMR (125 MHz,  $\text{CDCl}_3$ )  $\delta$ : 161.97, 150.77, 149.96, 147.37, 136.89, 130.68, 128.85, 127.19, 126.96, 126.56, 122.83, 119.19; HRMS (ESI)  $m/z$ : calcd for  $\text{C}_{14}\text{H}_{11}\text{N}_2\text{O}$ ,  $[\text{M}+\text{H}]^+$ : 223.0793; Found: 223.0867.

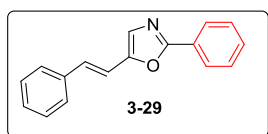

**(E)-2-phenyl-5-styryloxazole: white solid;**  $^1\text{H}$  NMR (500 MHz,  $\text{CDCl}_3$ )  $\delta$ : 8.15-8.13 (m, 2H), 7.55-7.50 (m, 5H), 7.43-7.40 (m, 2H), 7.34 (d,  $J = 7.5$  Hz, 1H), 7.22-7.19 (m, 2H), 6.97 (d,  $J = 16.0$  Hz, 1H);  $^{13}\text{C}$  NMR (125 MHz,  $\text{CDCl}_3$ )  $\delta$ : 161.10, 150.36, 136.41, 130.42, 129.47, 128.83, 128.25, 127.37, 126.58, 126.51, 126.41, 113.10; HRMS (ESI)  $m/z$ : calcd for  $\text{C}_{17}\text{H}_{14}\text{NO}$ ,  $[\text{M}+\text{H}]^+$ : 248.0997; Found: 248.1073.

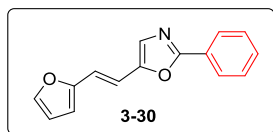

**(E)-5-(2-(furan-2-yl)vinyl)-2-phenyloxazole: white solid;**  $^1\text{H}$  NMR (500 MHz,  $\text{CDCl}_3$ )  $\delta$ : 8.12-8.10 (m, 2H), 7.50-7.45 (m, 4H), 7.16 (s, 1H), 6.97 (d,  $J = 16.0$  Hz, 1H), 6.87 (d,  $J = 16.0$  Hz, 1H), 6.47-6.44 (m, 2H);  $^{13}\text{C}$  NMR (125 MHz,  $\text{CDCl}_3$ )  $\delta$ : 160.99, 152.41, 150.13, 142.79, 130.40, 128.81, 127.32, 126.60, 126.37, 116.98, 111.95, 111.31, 110.05; HRMS (ESI)  $m/z$ : calcd for  $\text{C}_{15}\text{H}_{12}\text{NO}_2$ ,  $[\text{M}+\text{H}]^+$ : 238.0790; Found: 238.0862.

## 4. References

- Meng, G.; Szostak, M. *Org. Lett.*, **2016**, *18*, 796.
- (a) Besselièvre, F.; Mahuteau-Betzer, F.; Grierson, D. S.; Piguel, S. *J. Org. Chem.* **2008**, *73*, 3278. (b) Li, Y.; Liu, J.; Xie, Y.; Zhang, R.; Jin, K.; Wang, X.; Duan, C. *Org. Biomol. Chem.* **2012**, *10*, 3715.
- (a) Ohnmacht, S. A.; Mamone, P.; Culshaw, A. J.; Greaney, M. F. *Chem. Commun.* **2008**, 1241. (b) Jiang, H.; Huang, H.; Cao, H.; Qi, C. *Org. Lett.* **2010**, *12*, 5561. (c) Cheung, C. W.; Buchwald, S. L. *J. Org. Chem.* **2012**, *77*, 7526. (d) Tang, L.; Guo, X.; Yang, Y.; Zha, Z.; Wang, Z. *Chem. Commun.* **2014**, *50*, 6145. (e) Chatterjee, T.; Cho, J. Y.; Cho, E. J. *J. Org. Chem.* **2016**, *81*, 6995. (f) Meng, X.; Wang, Y.; Wang, Y.; Chen, B.; Jing, Z.; Chen, G.; Zhao, P. *J. Org. Chem.* **2017**, *82*, 6922. (g) Hanson, M. G.; Olson, N. M.; Yi, Z.; Wilson, G.; Kalyani, D. *Org. Lett.* **2017**, *19*, 4271.



## 5. <sup>1</sup>H and <sup>13</sup>C NMR spectra for compound 3

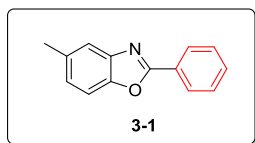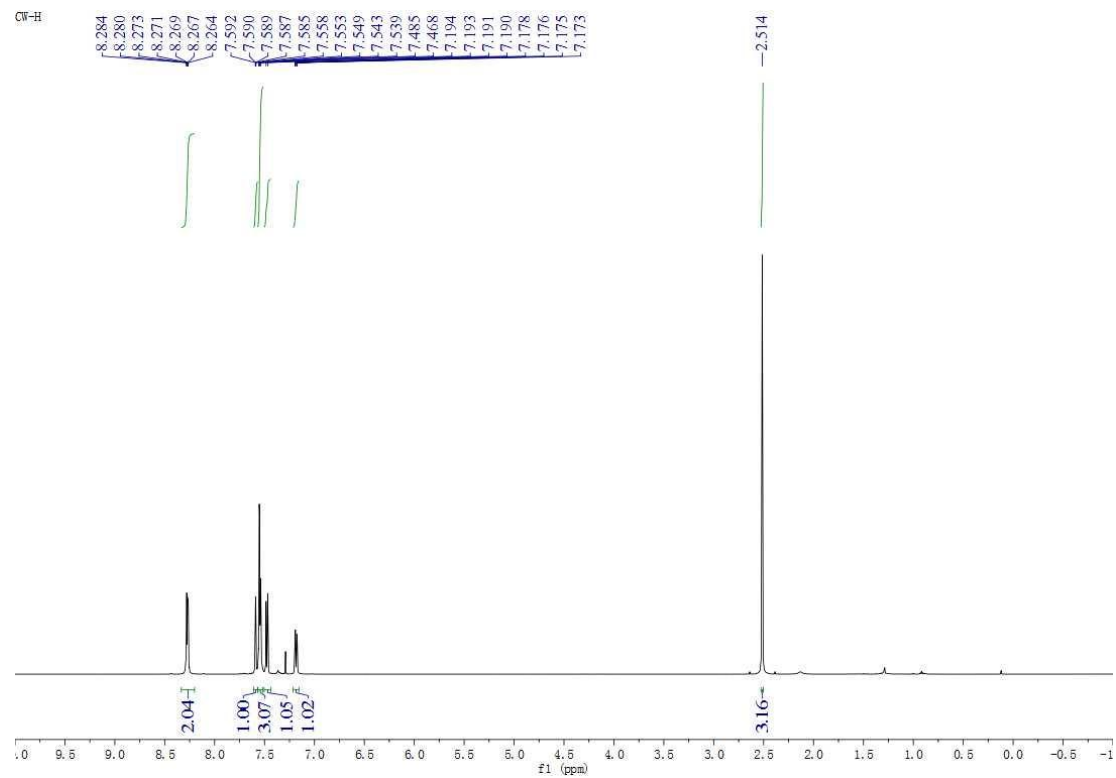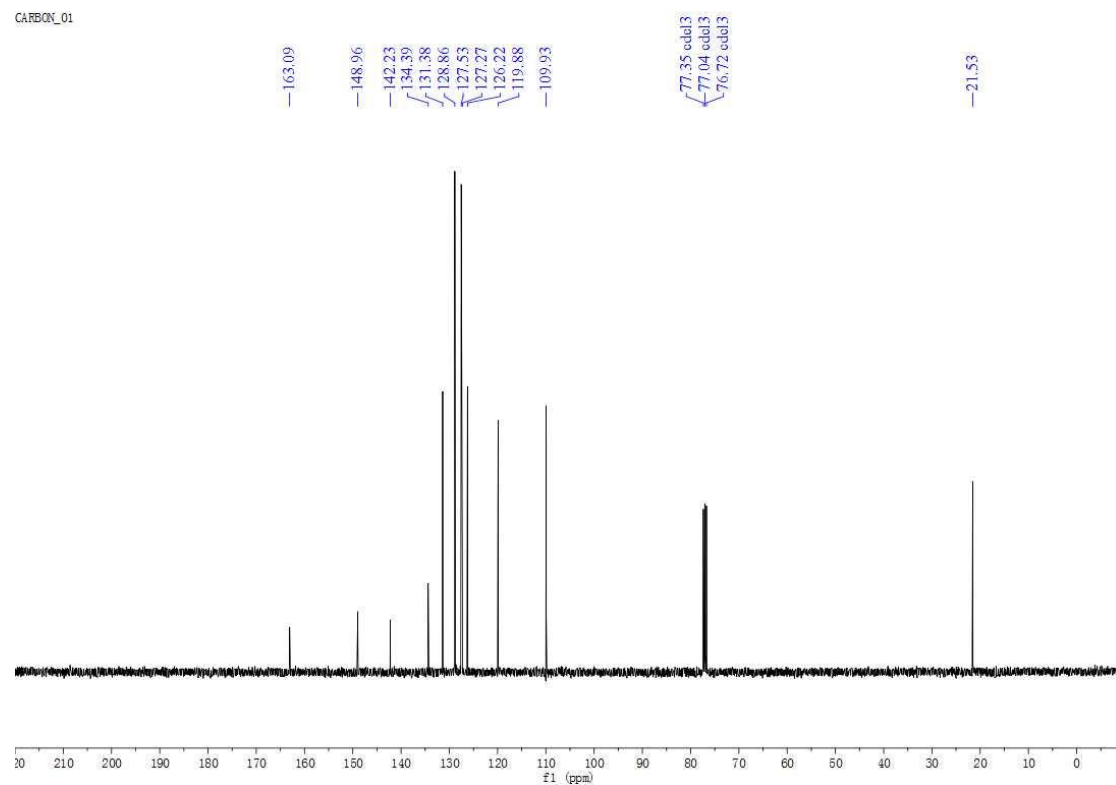

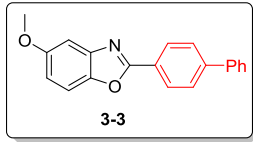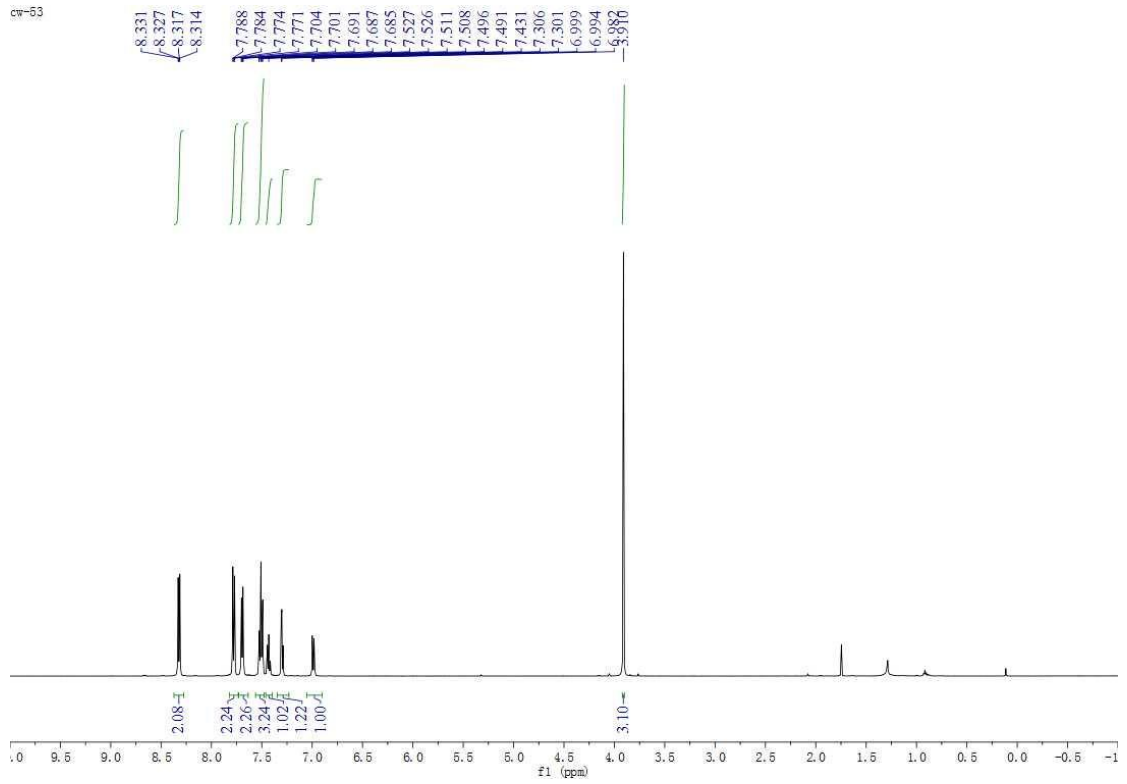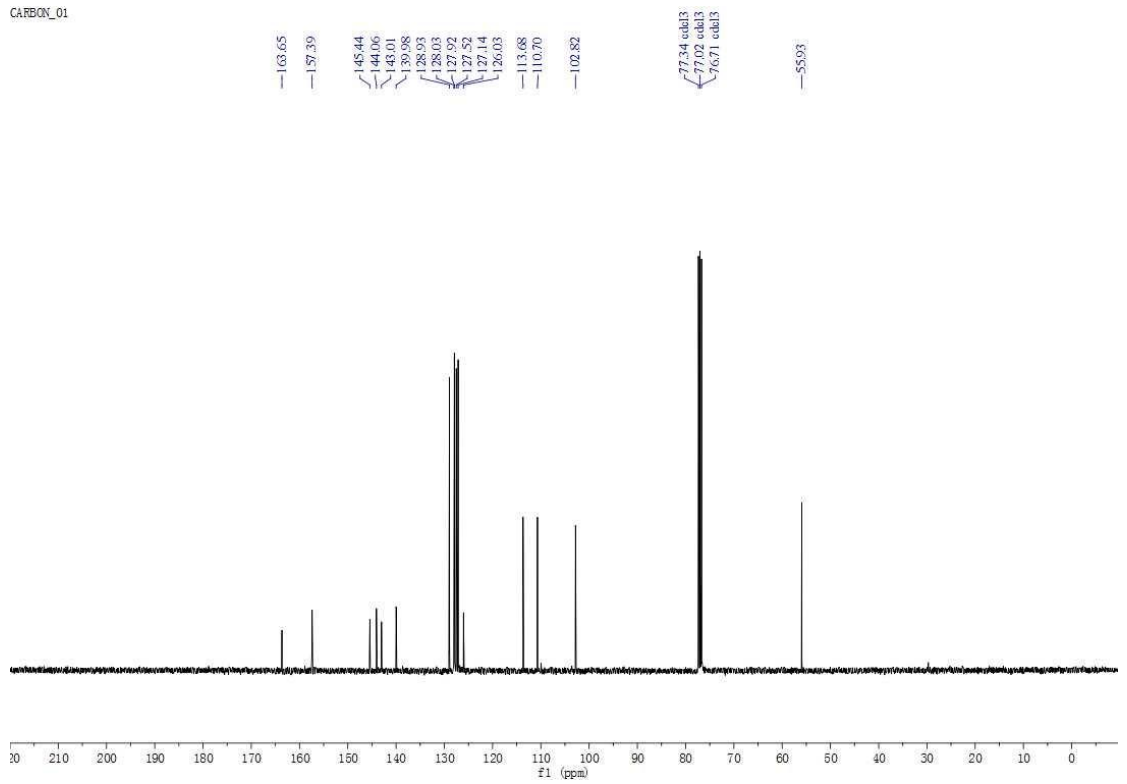

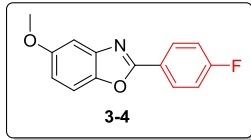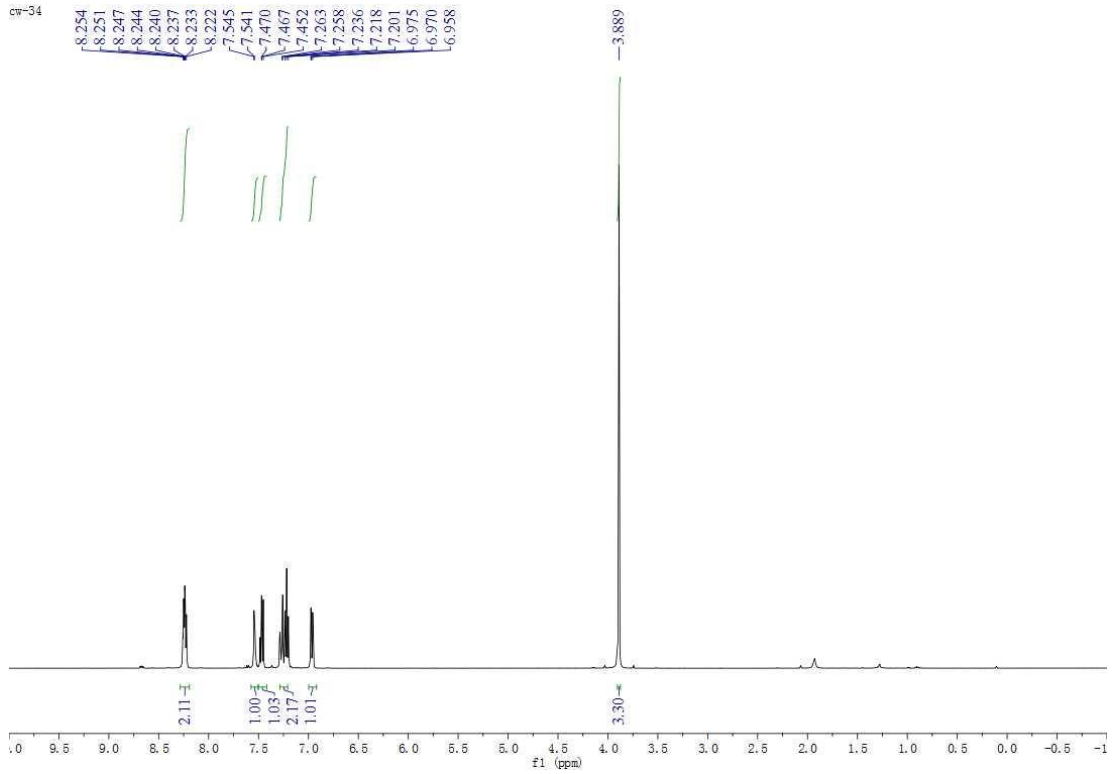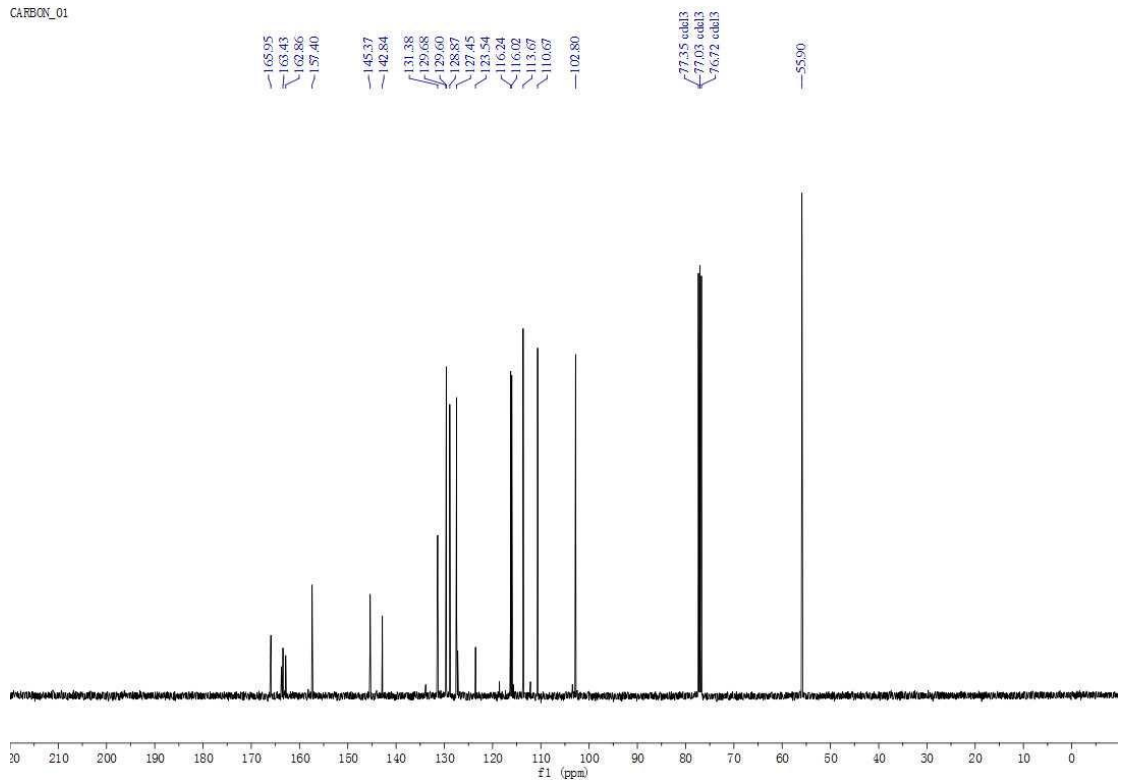

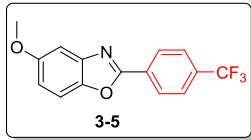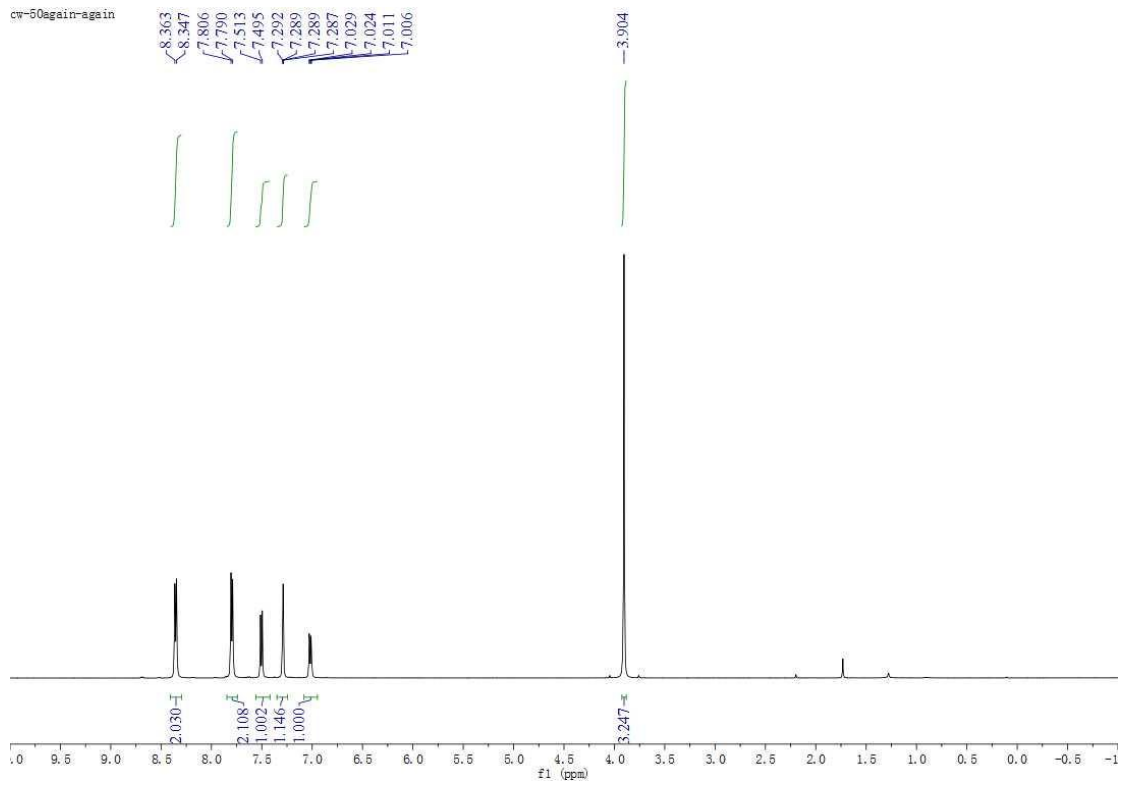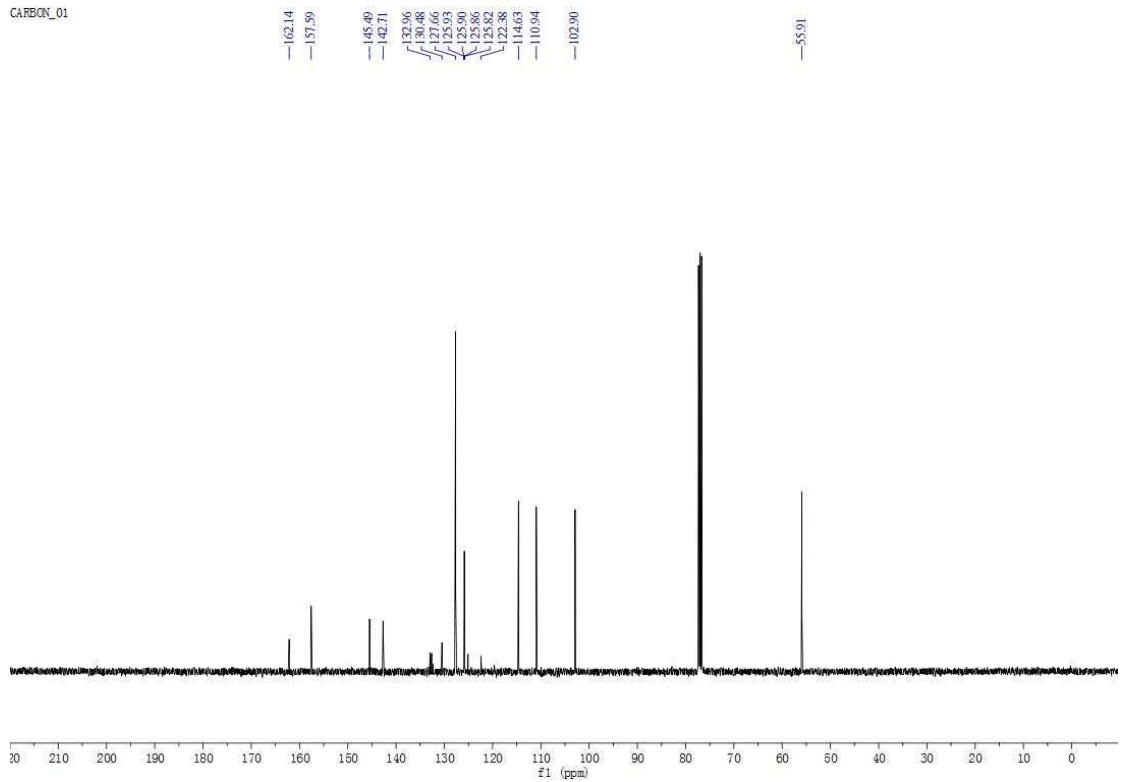

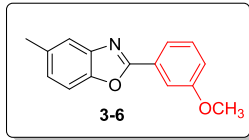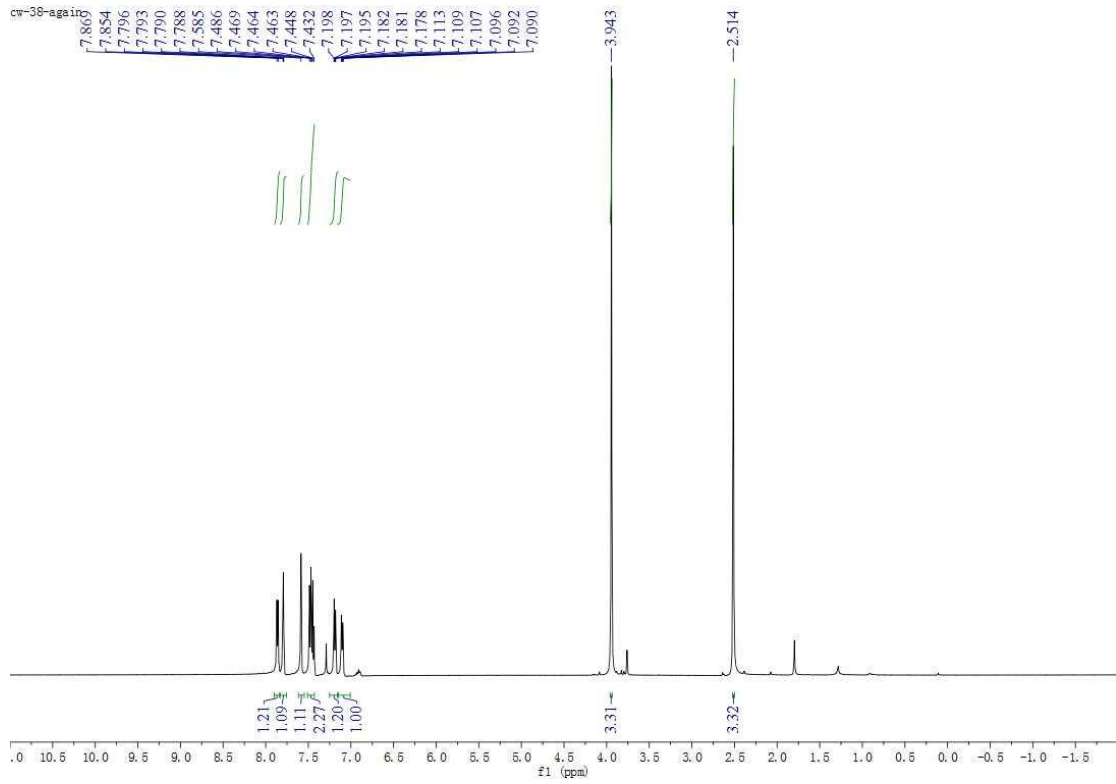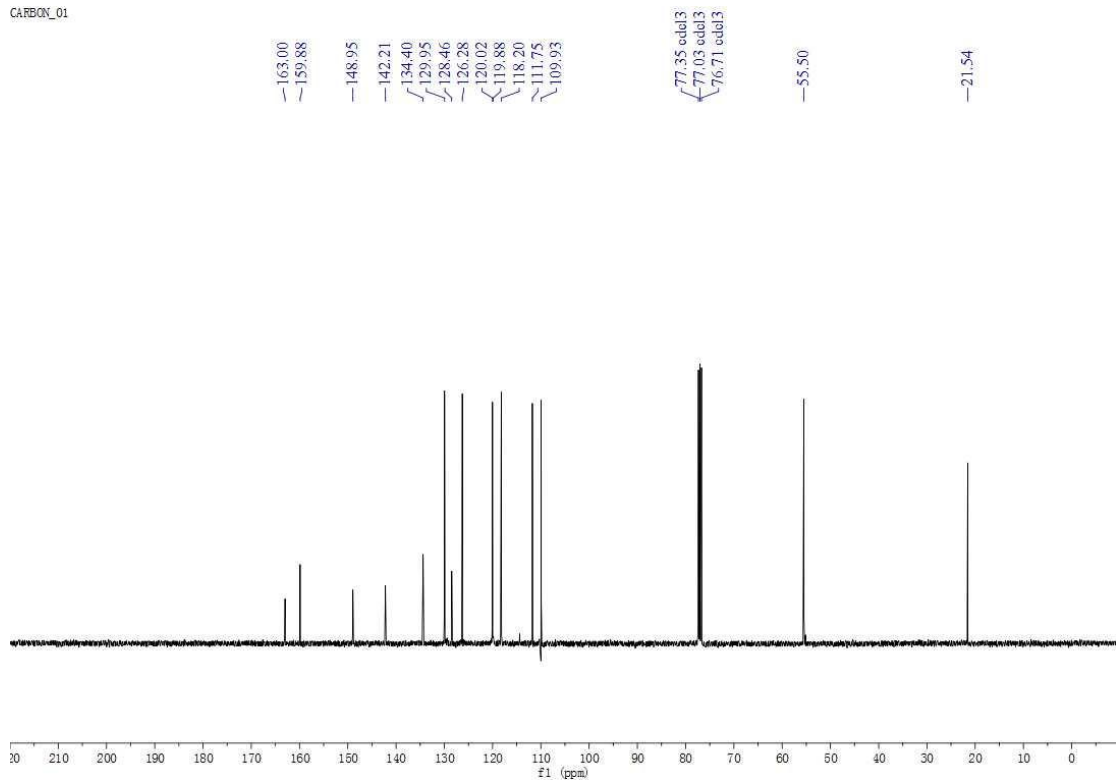

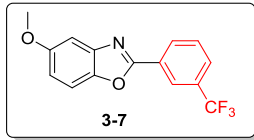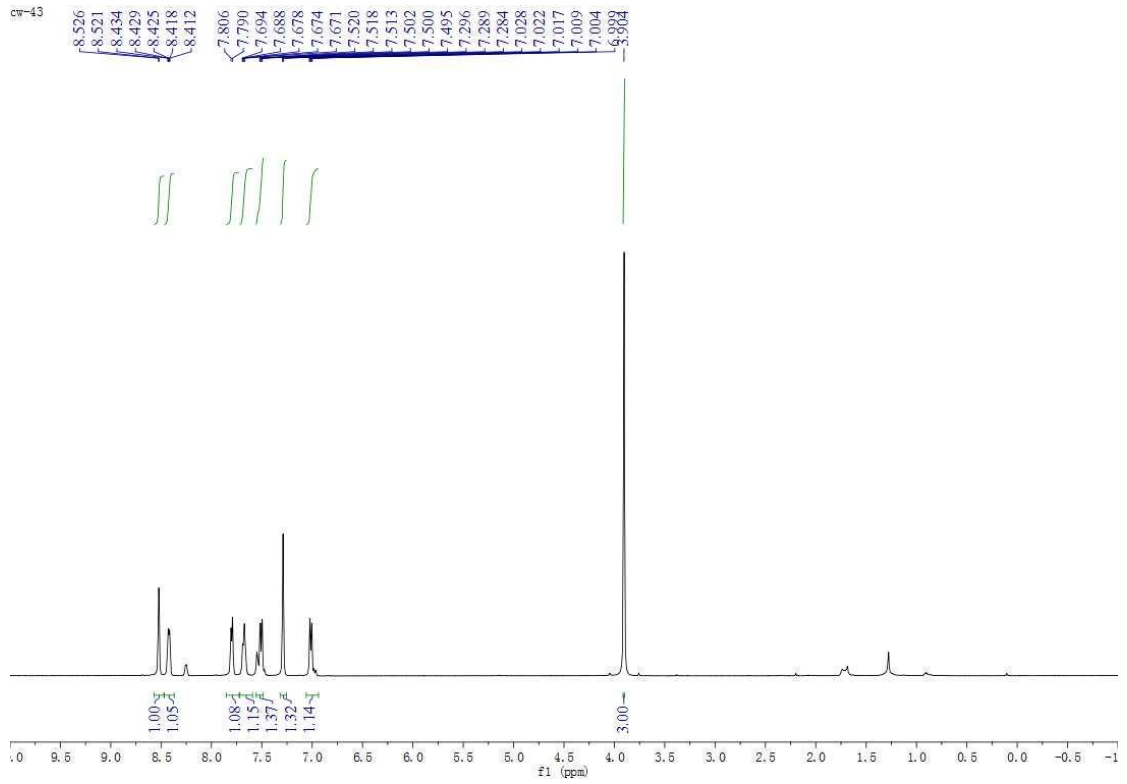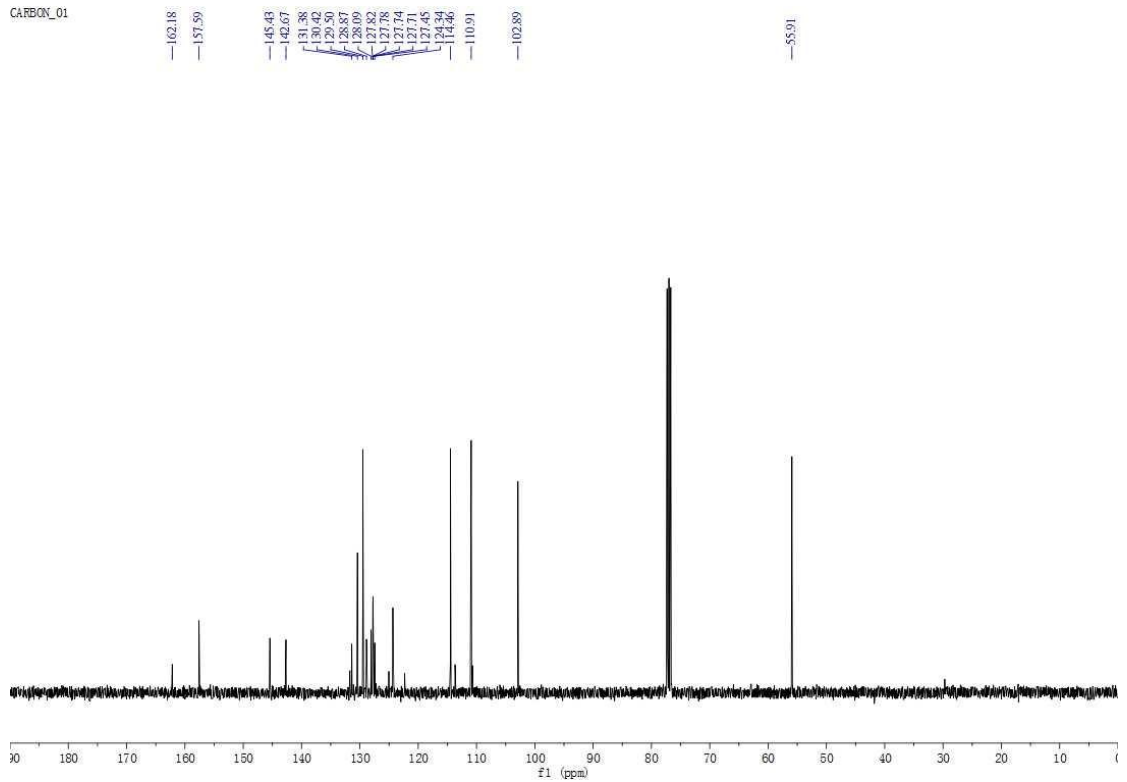

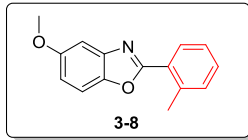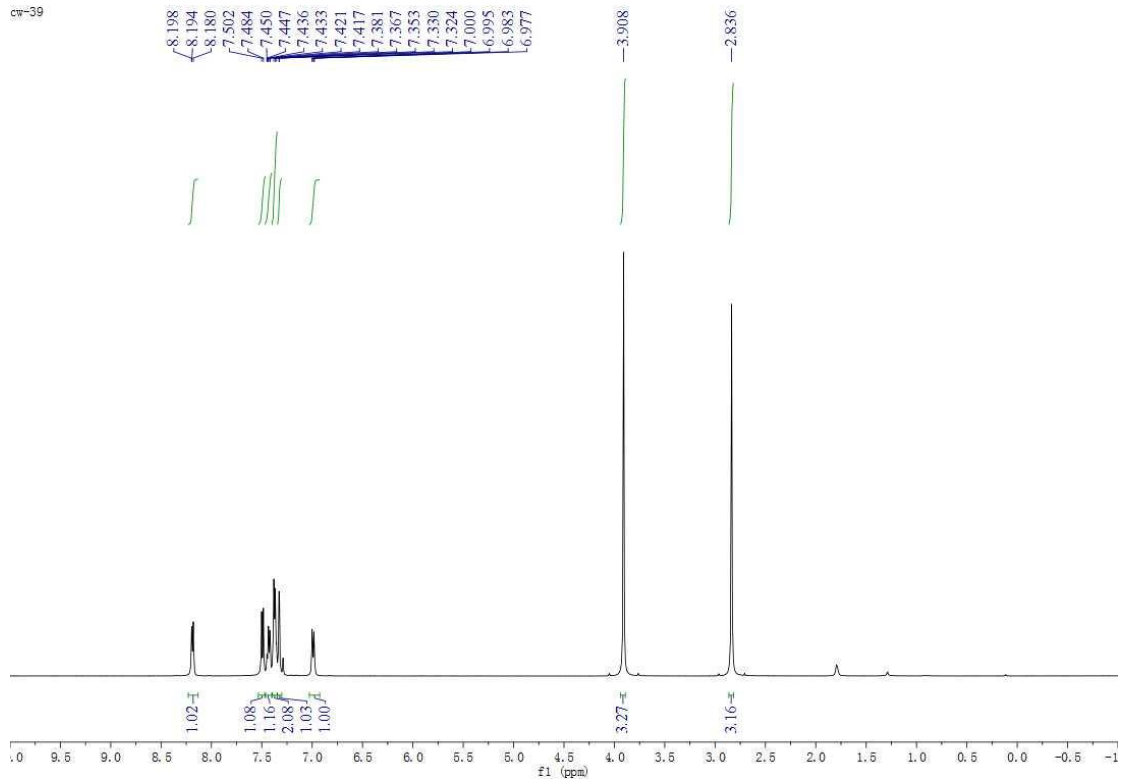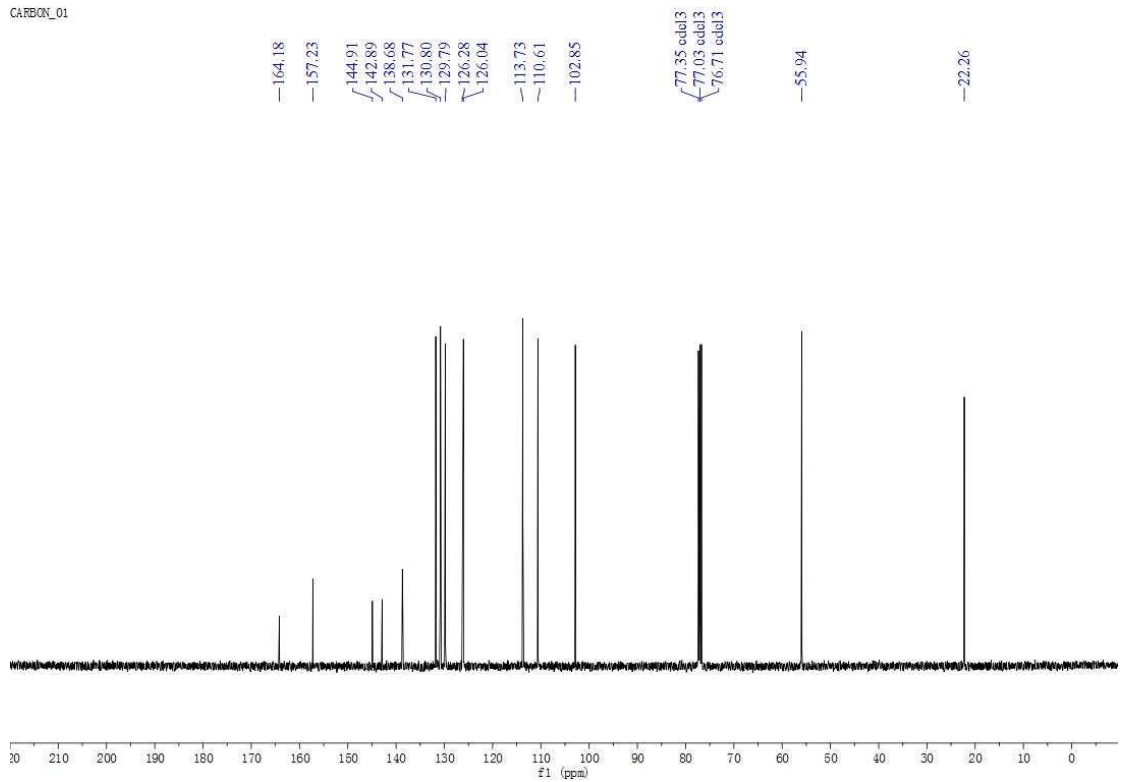

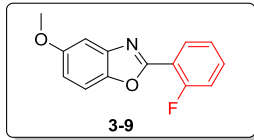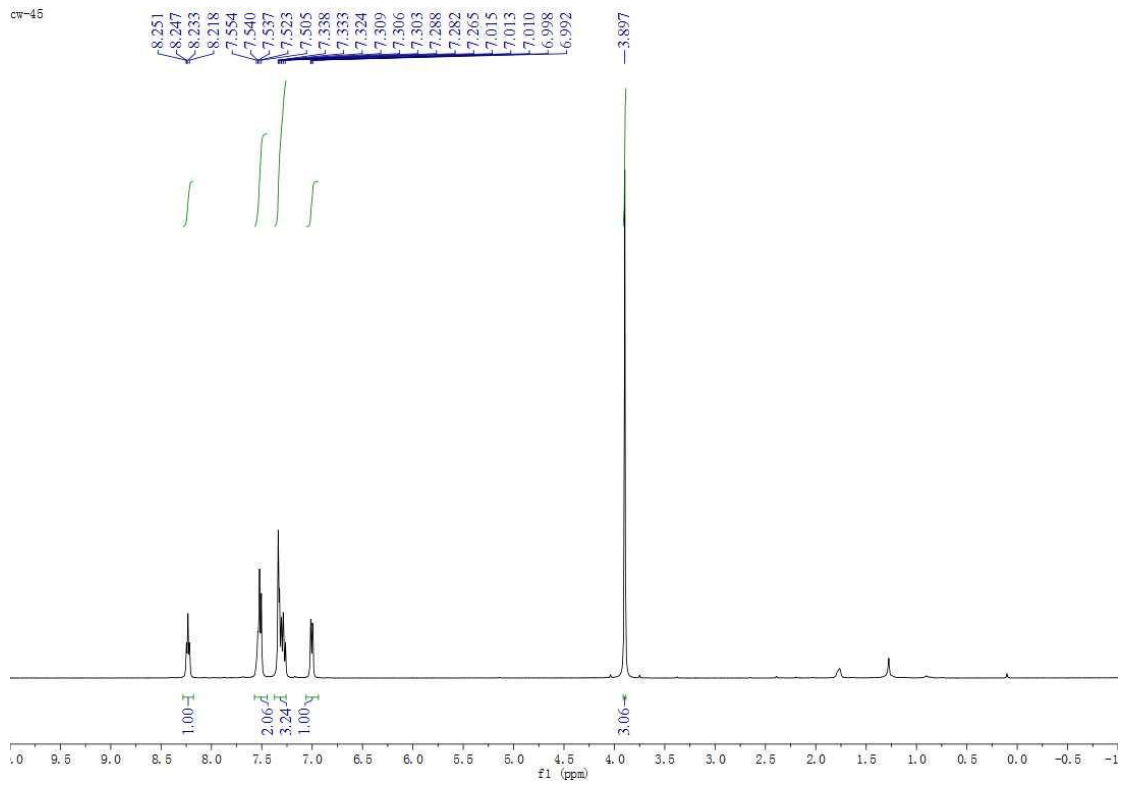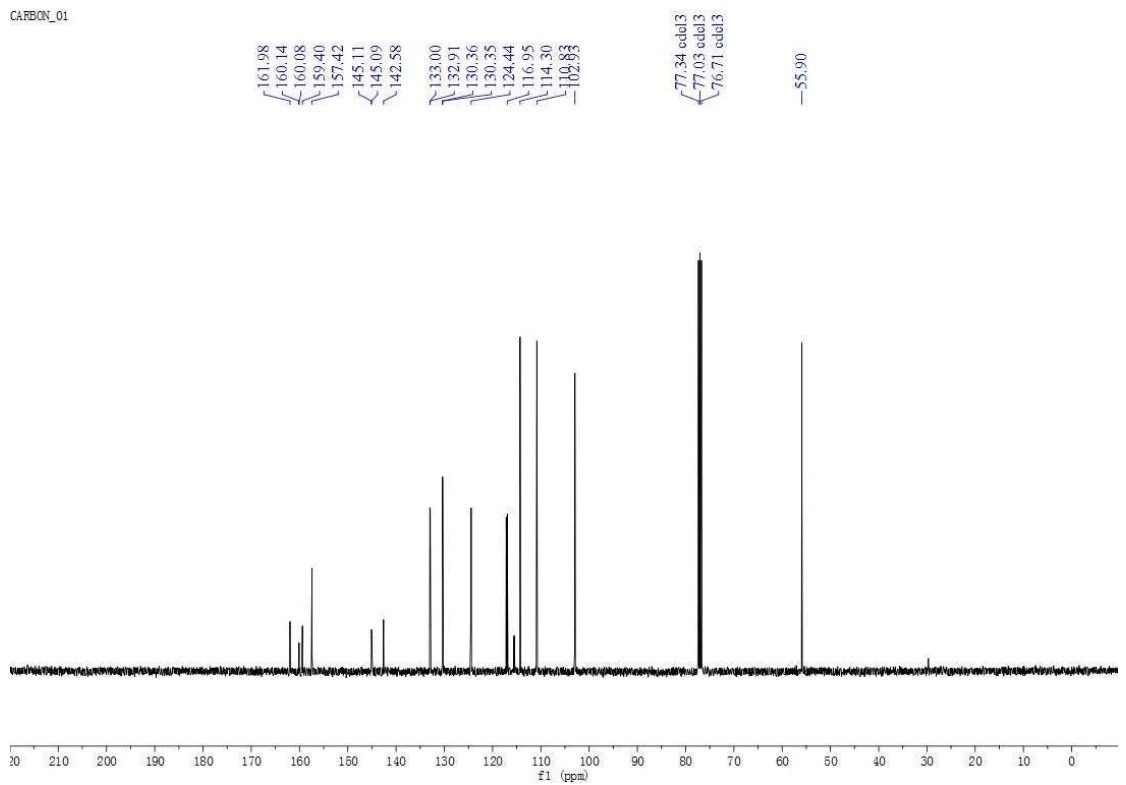



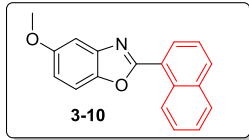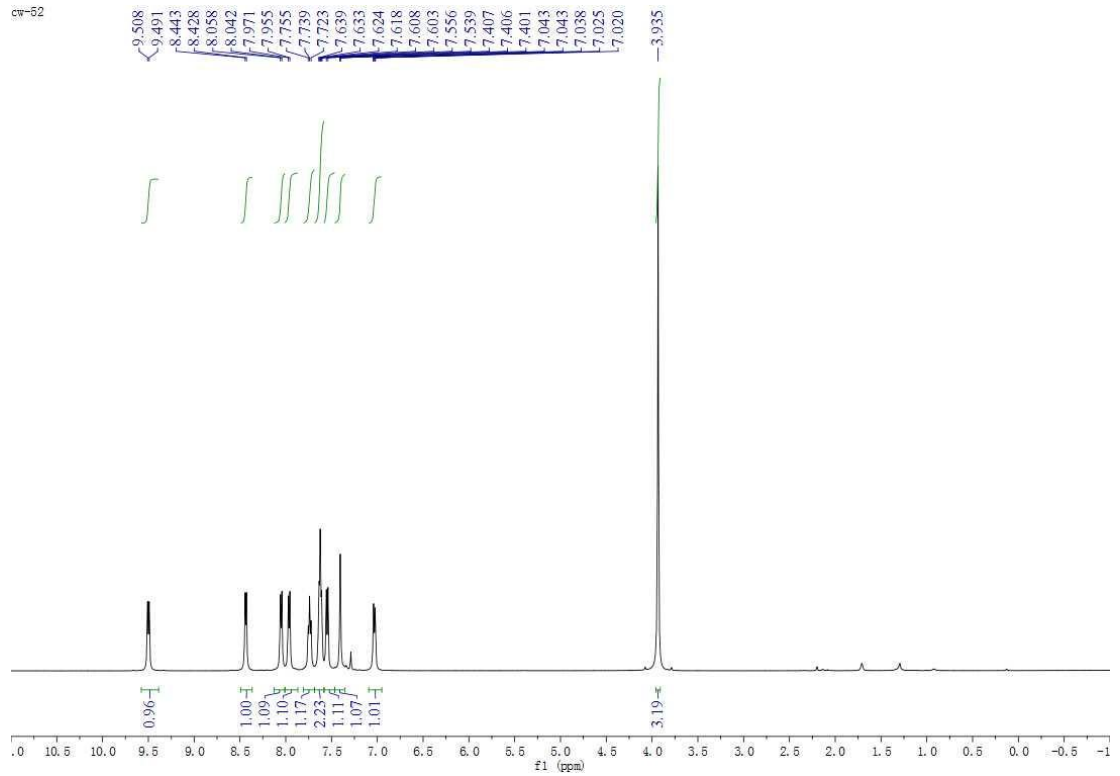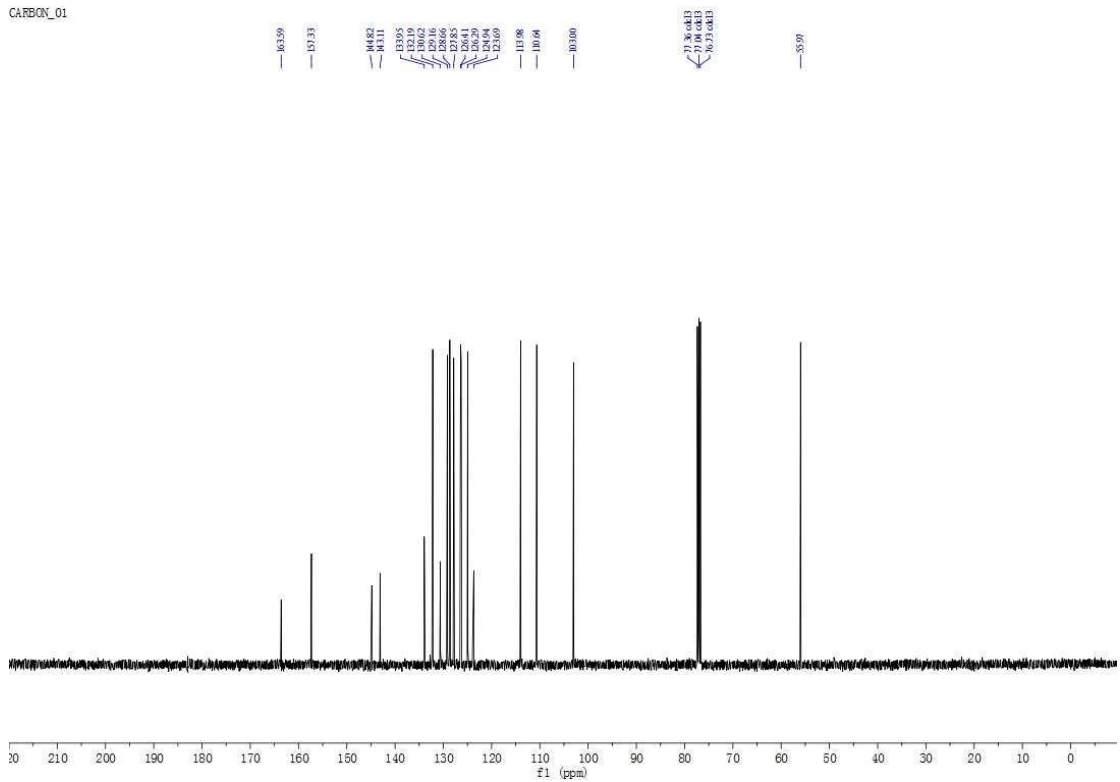

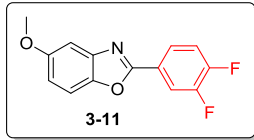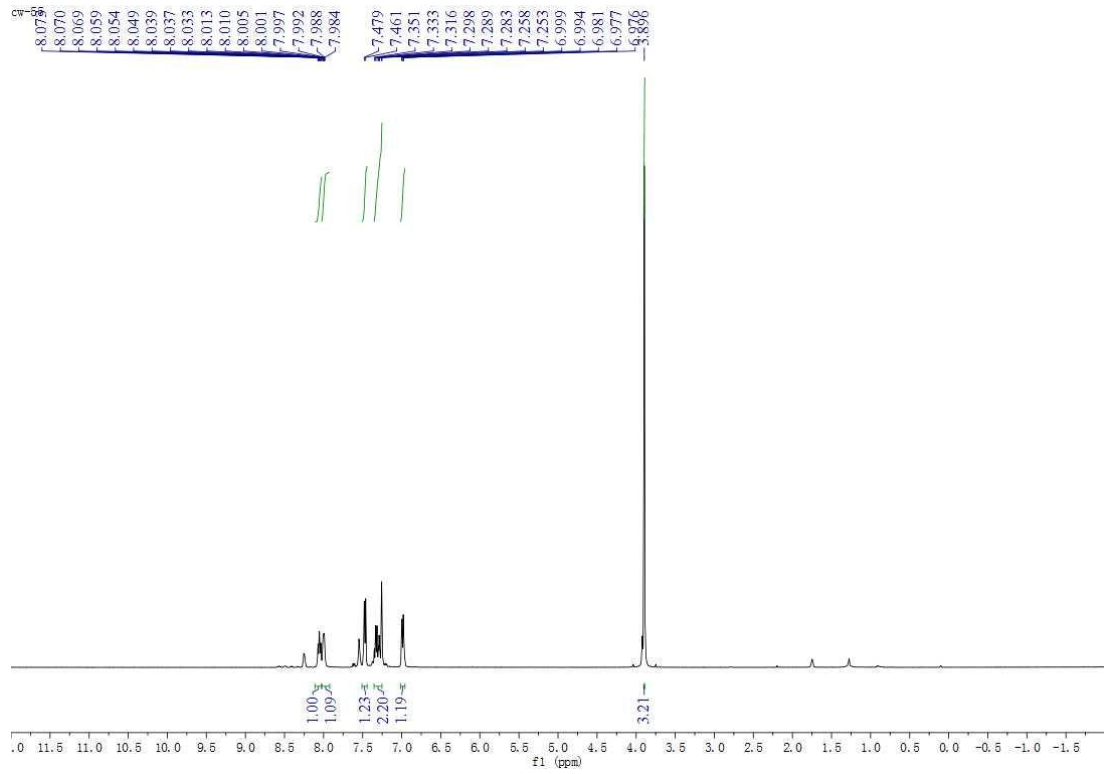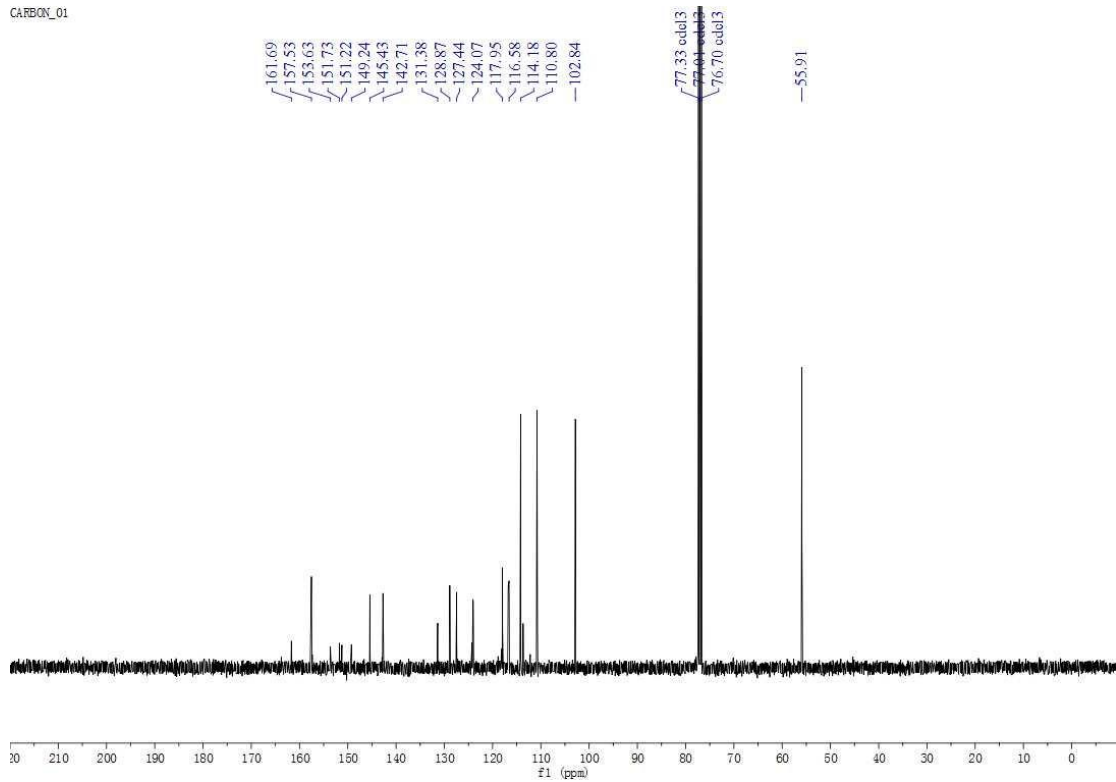

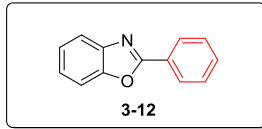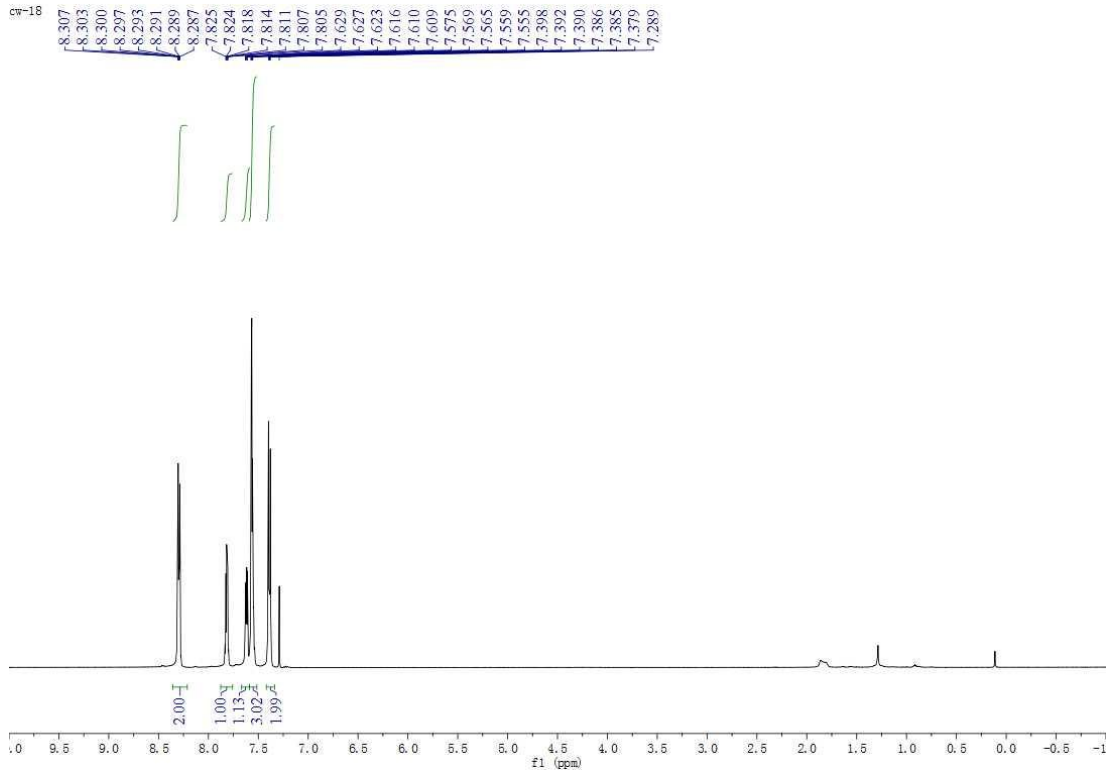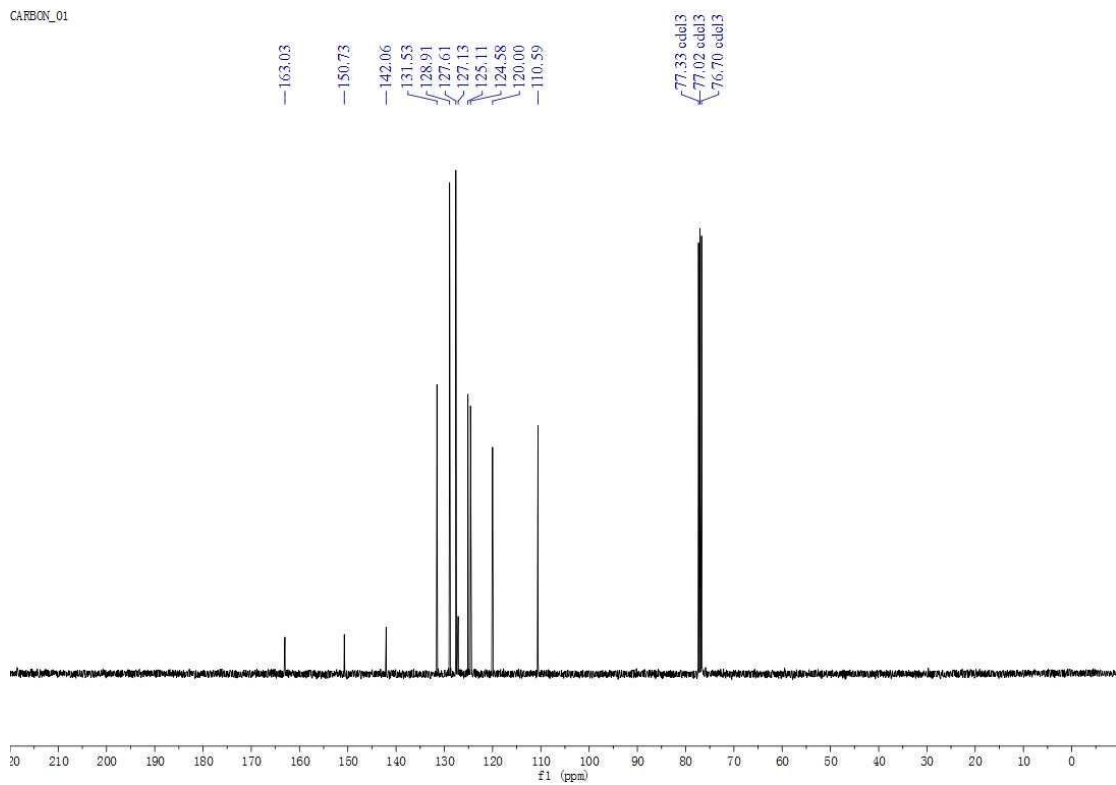

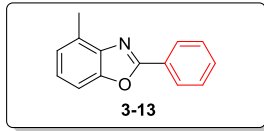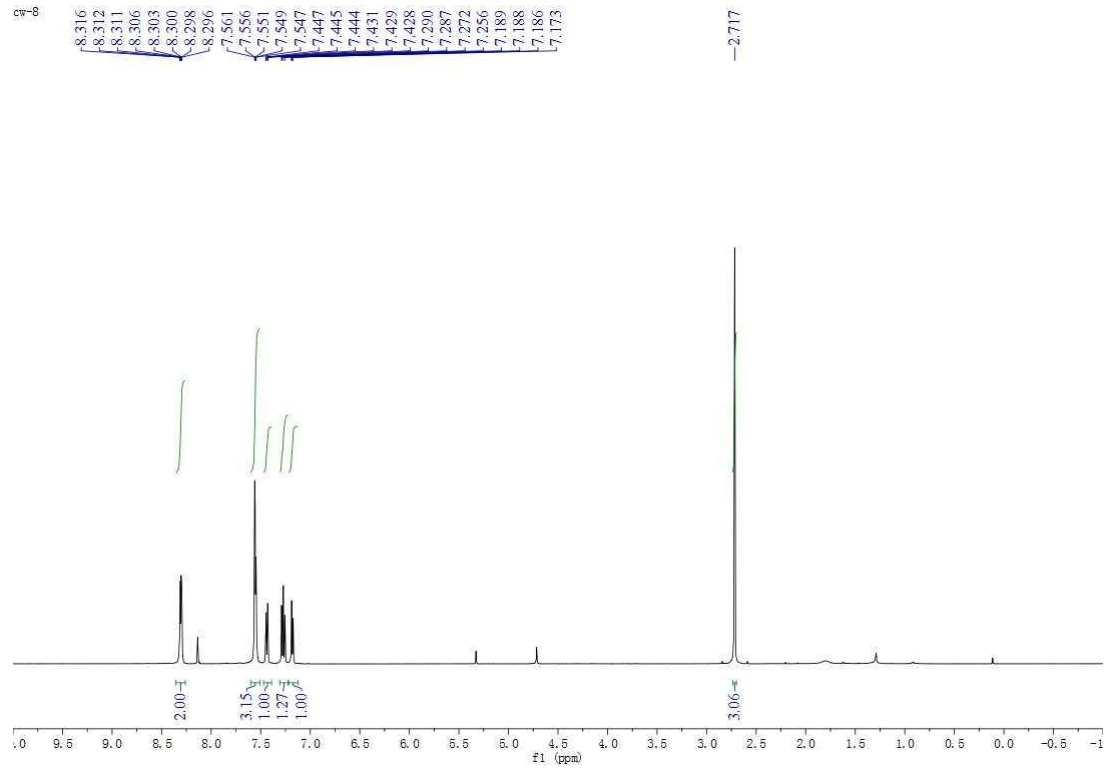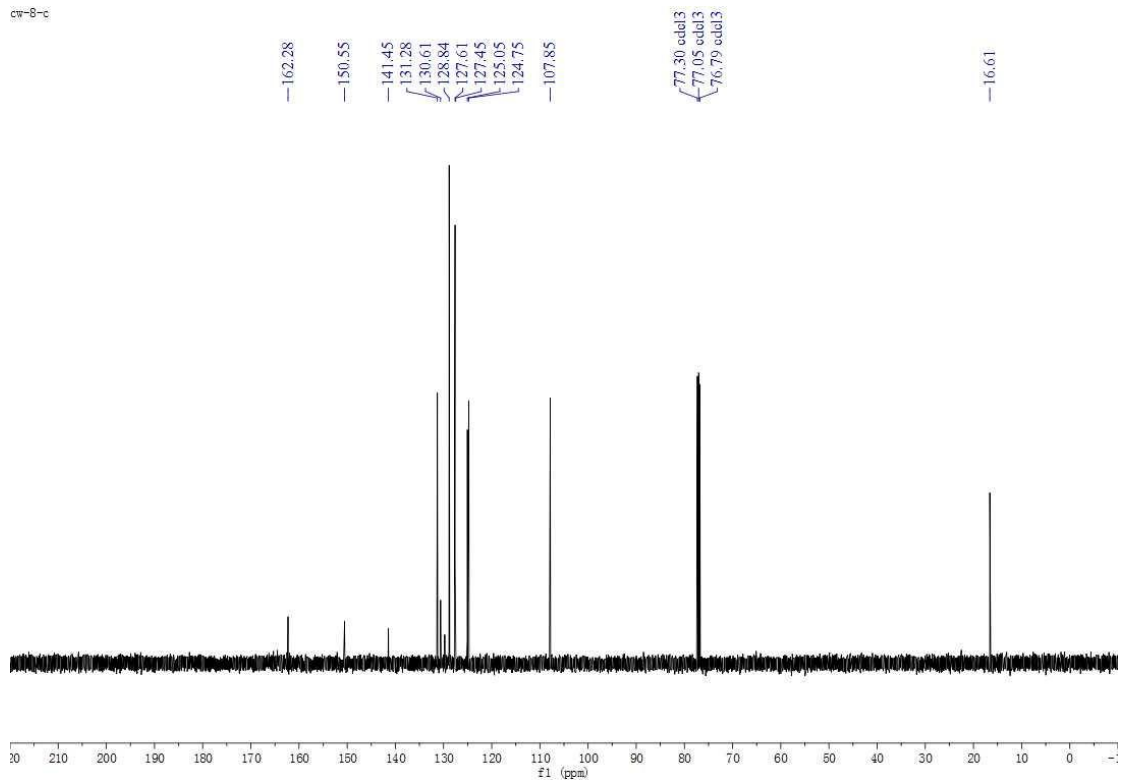

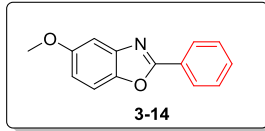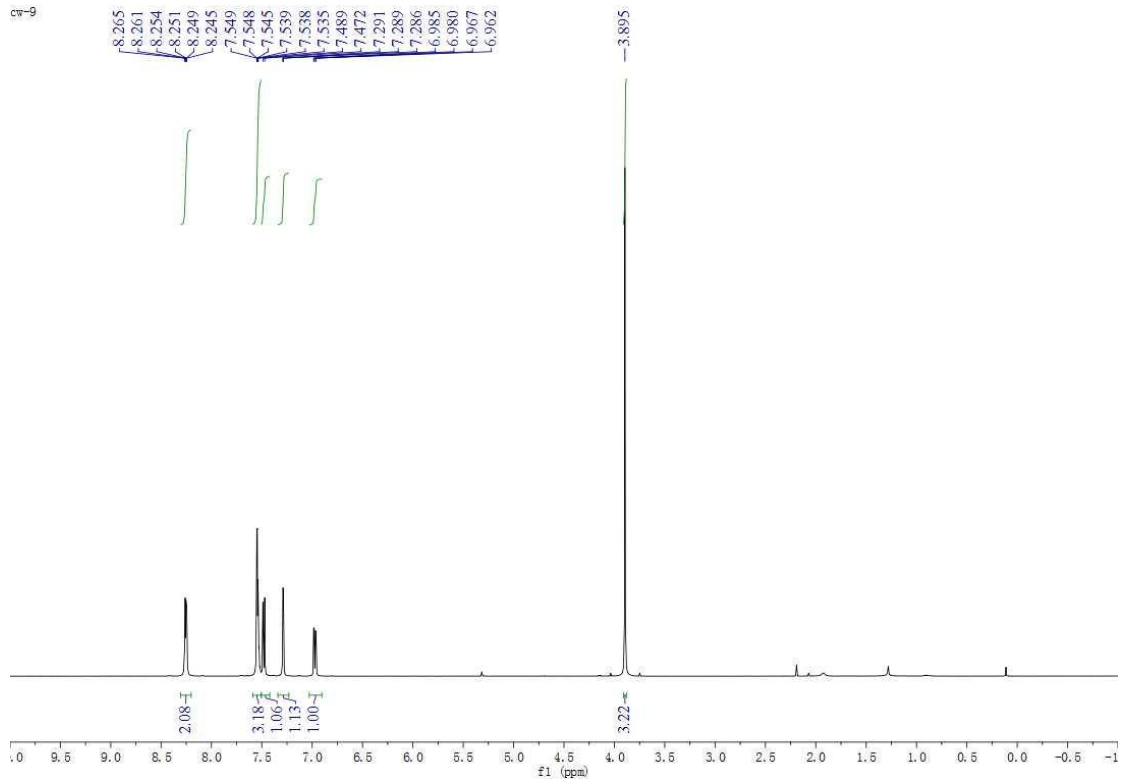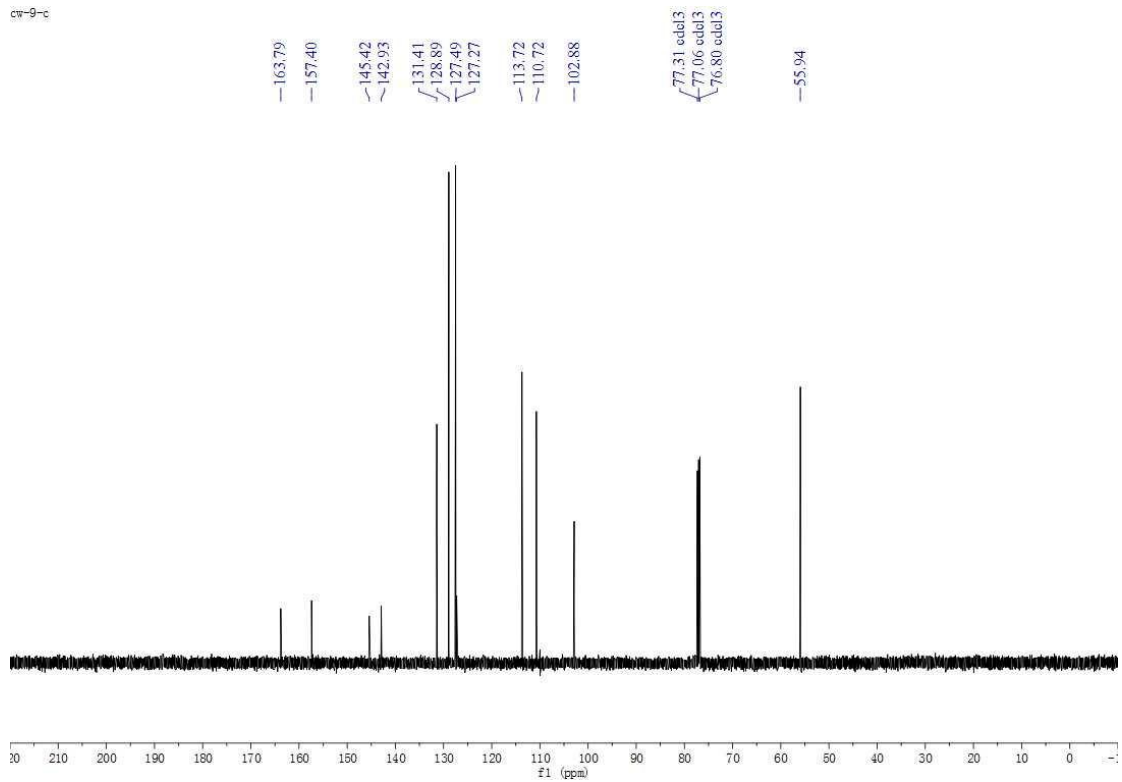

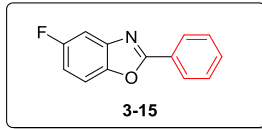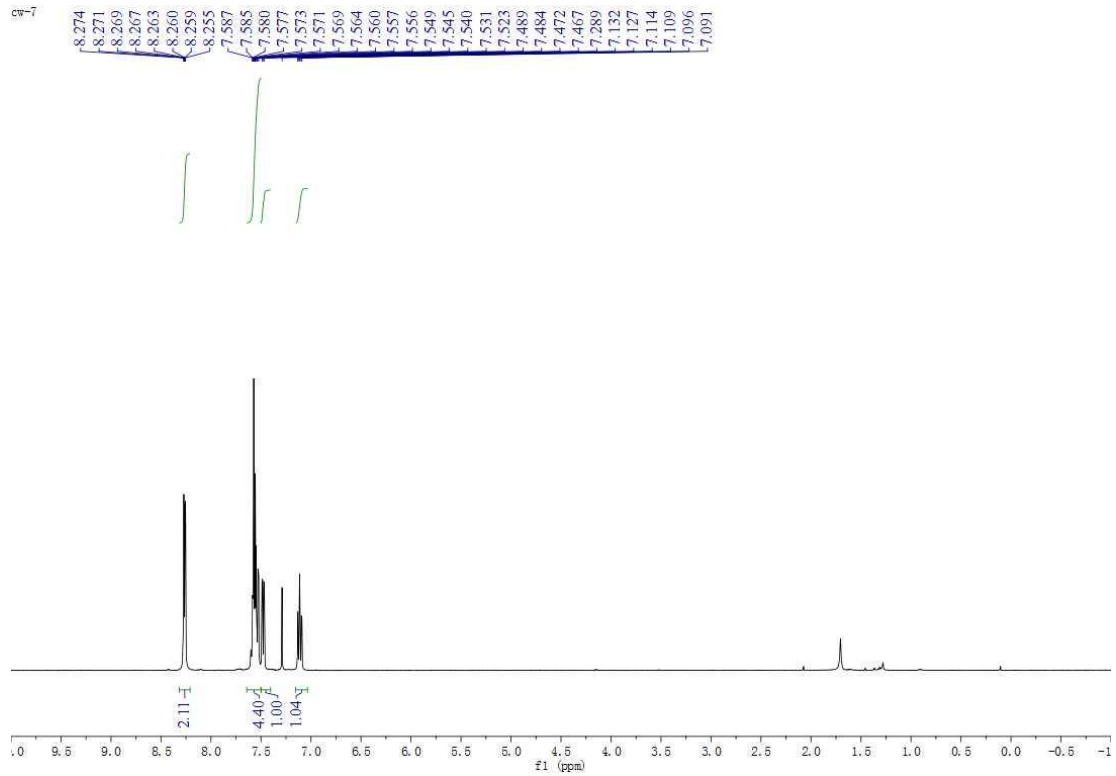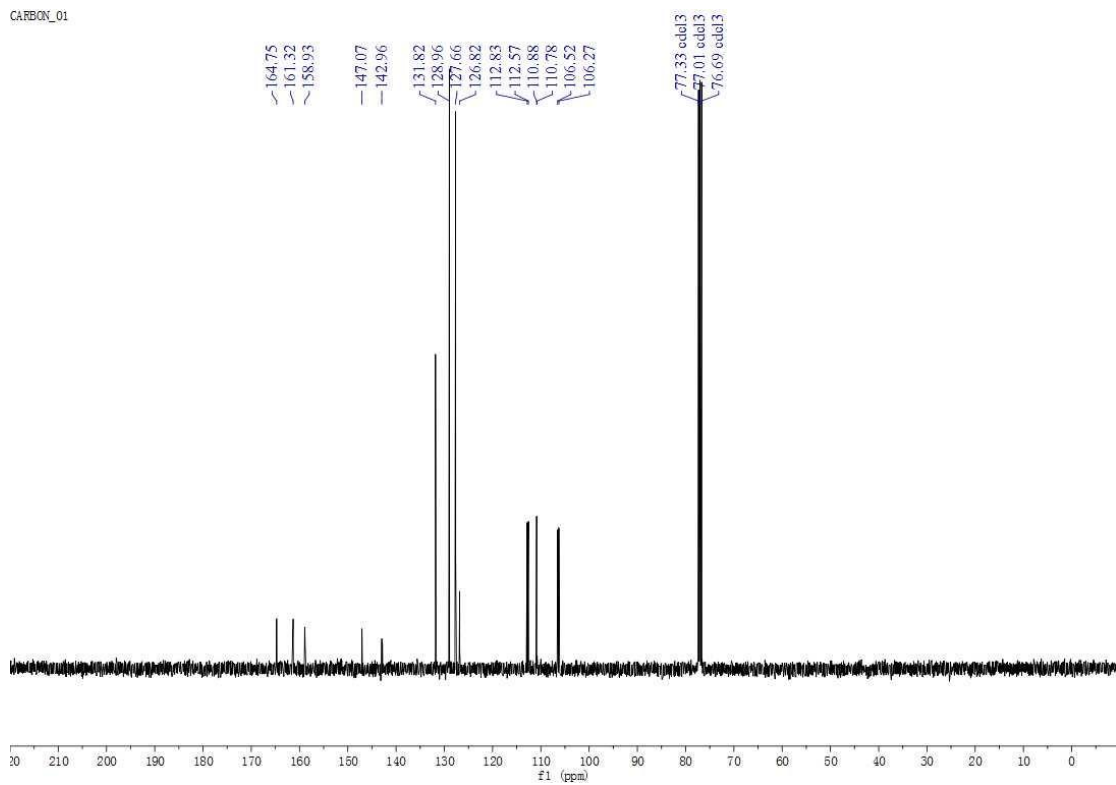

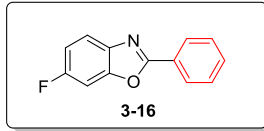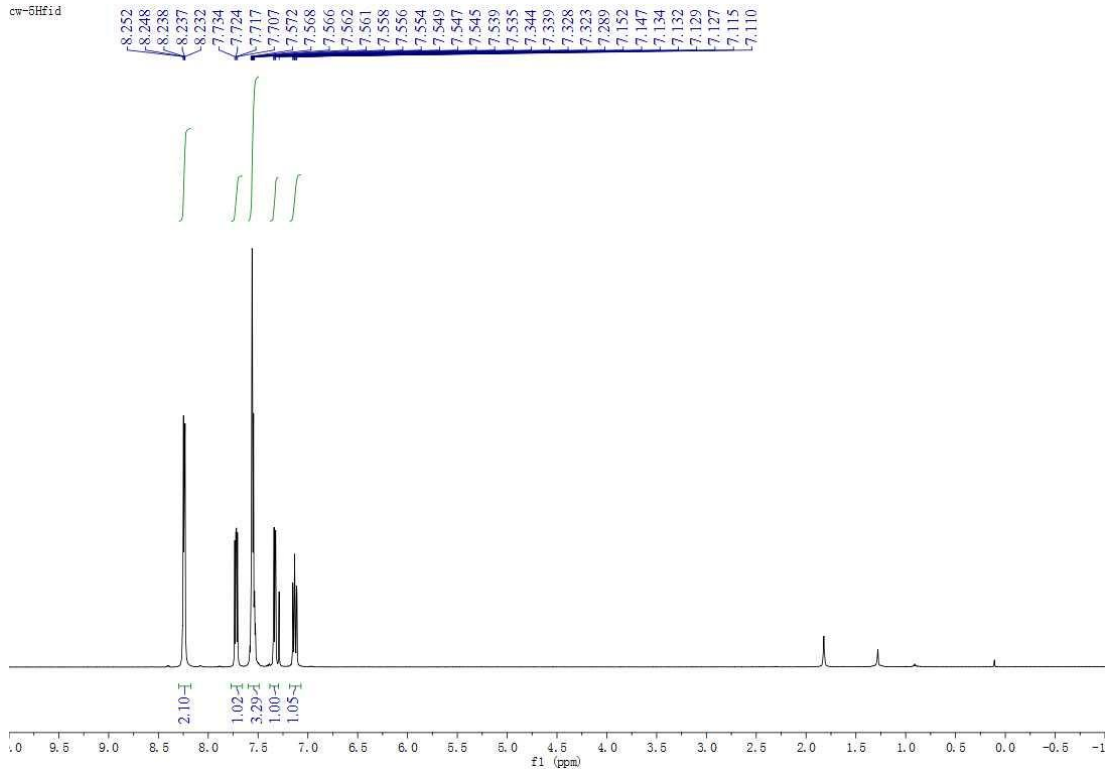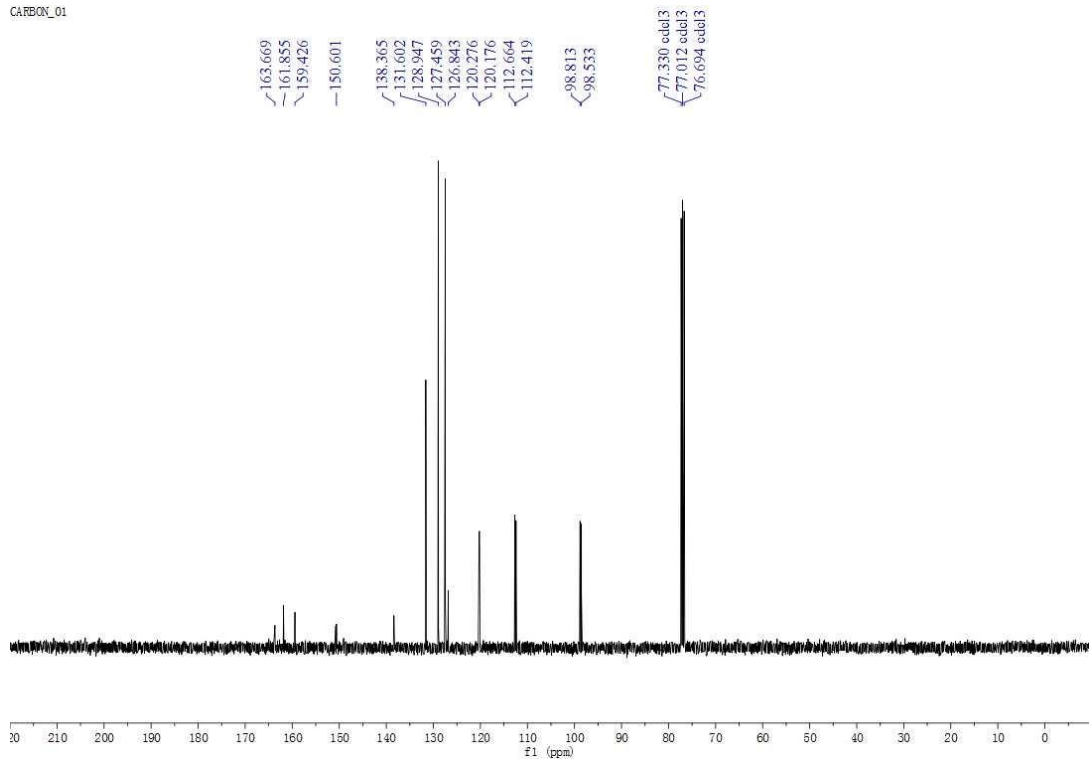

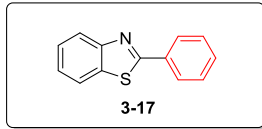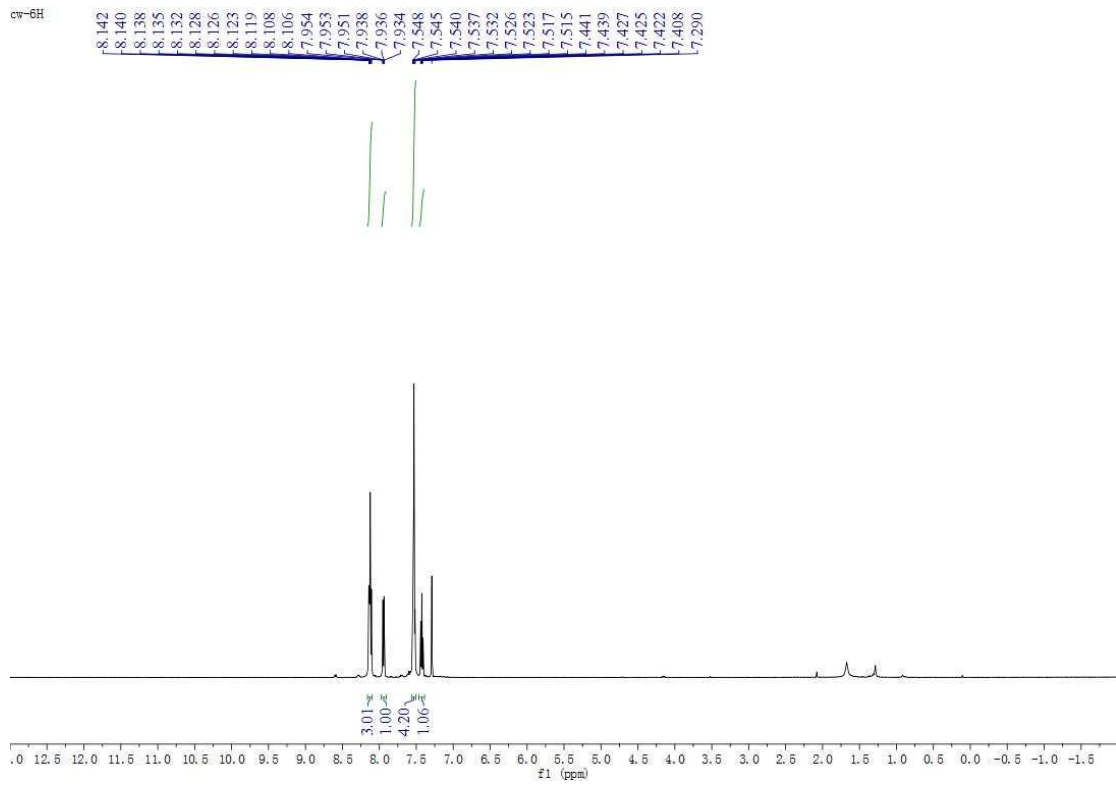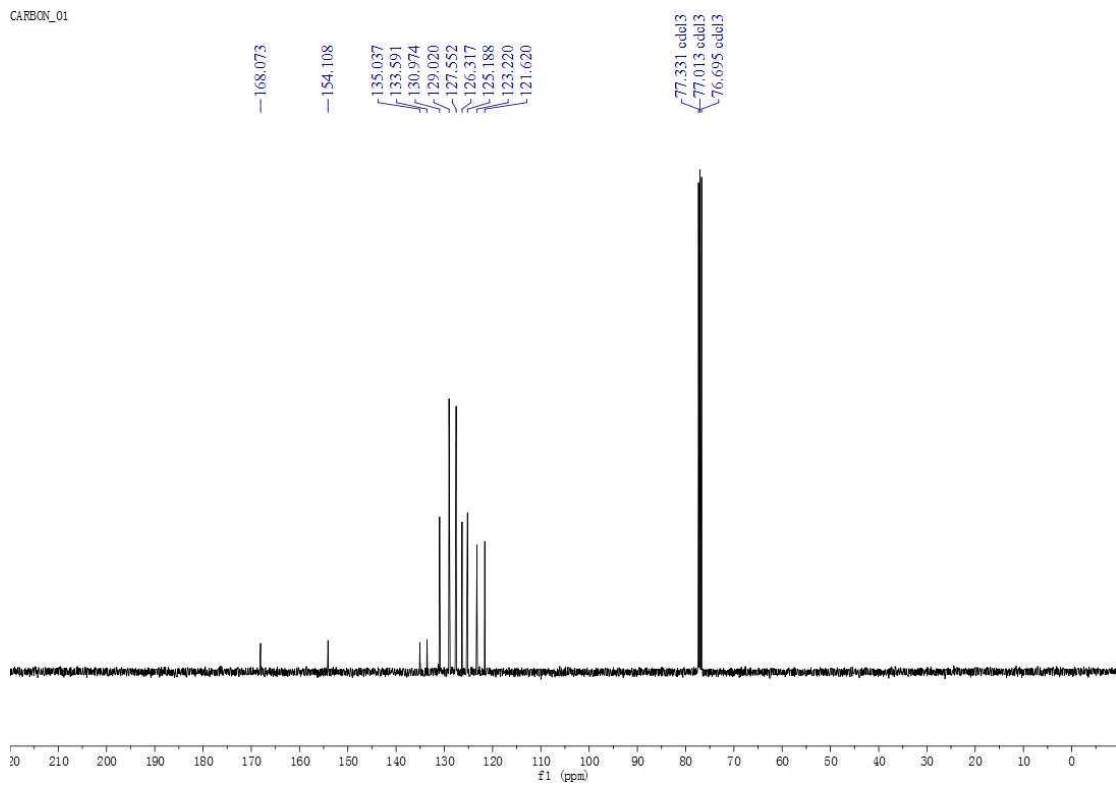



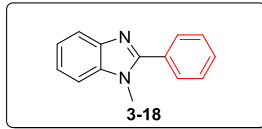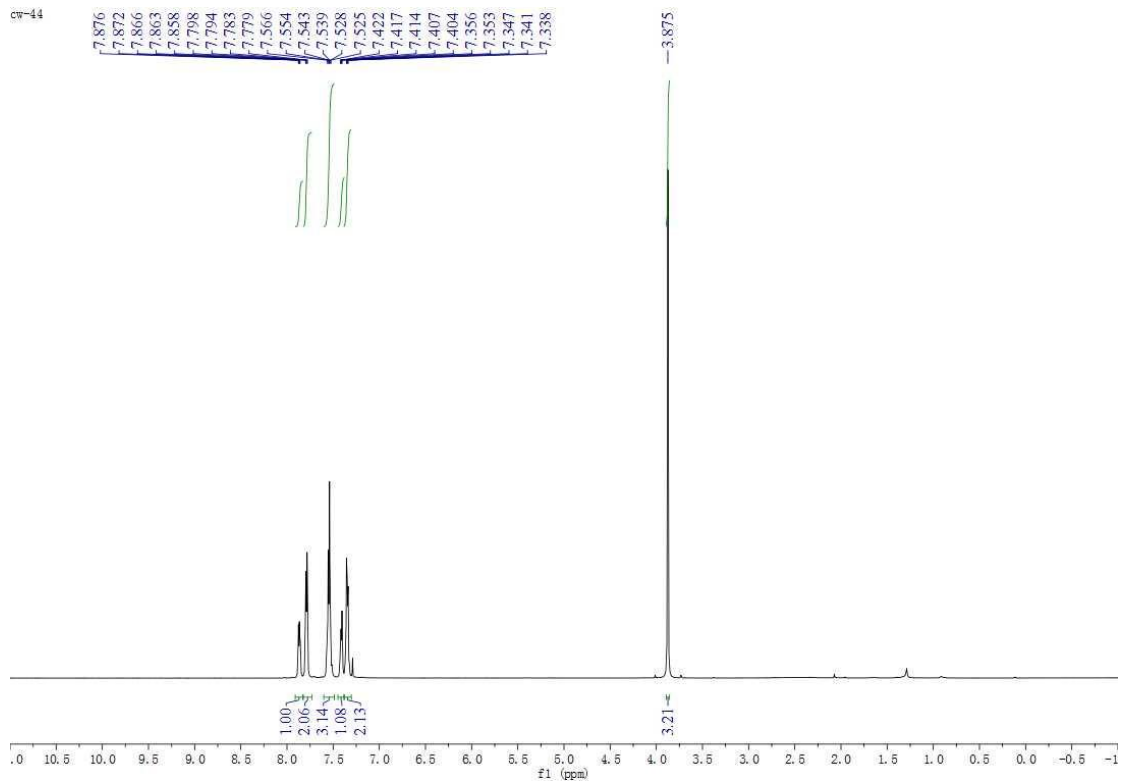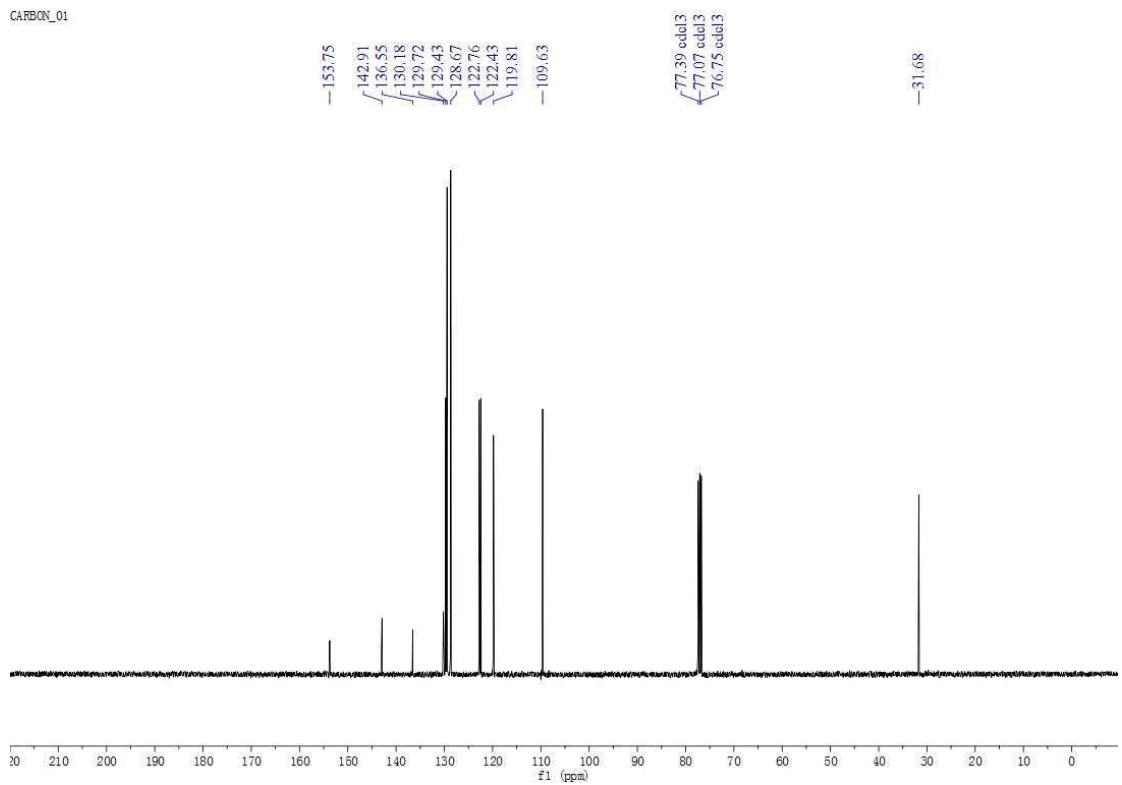

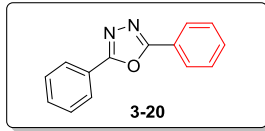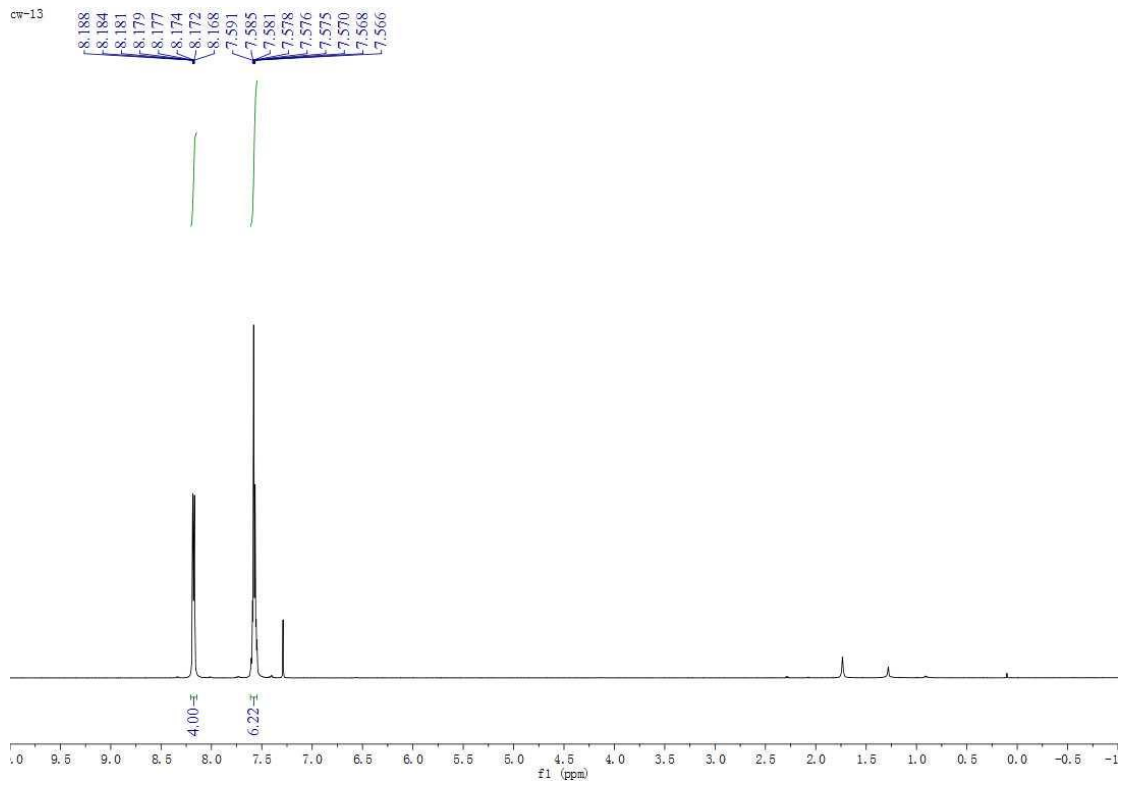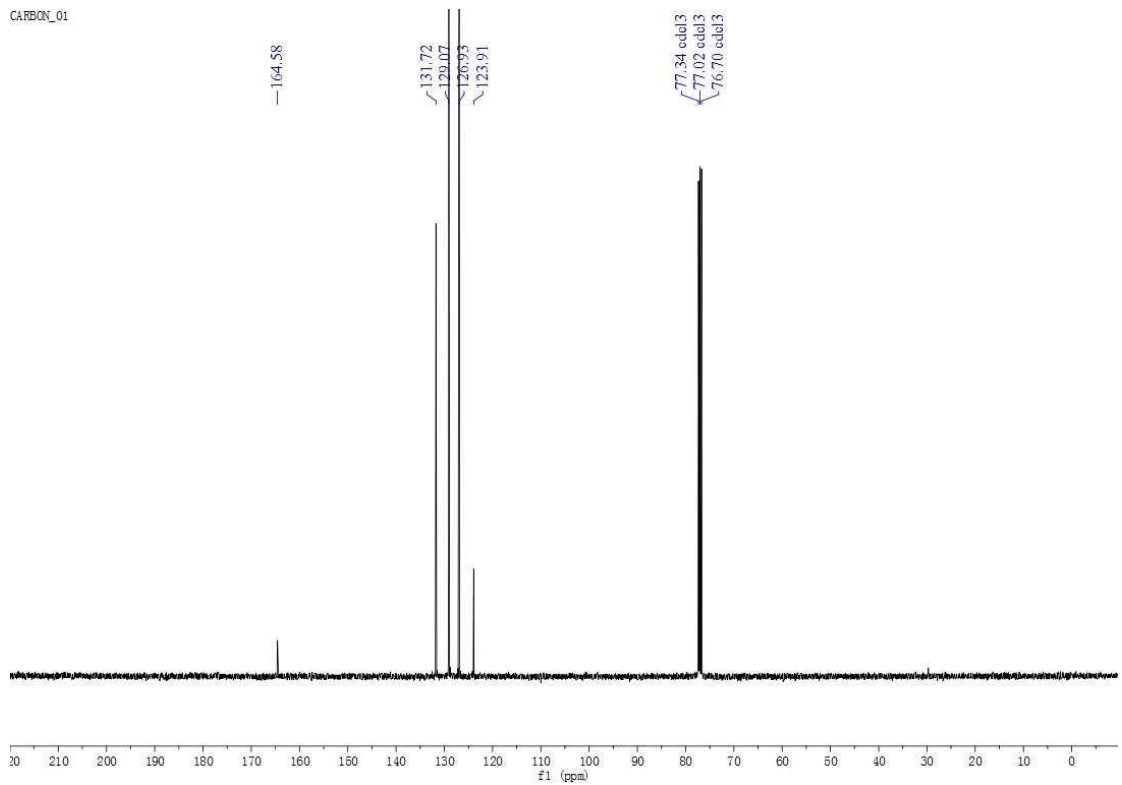

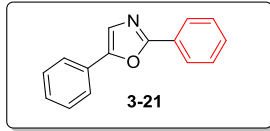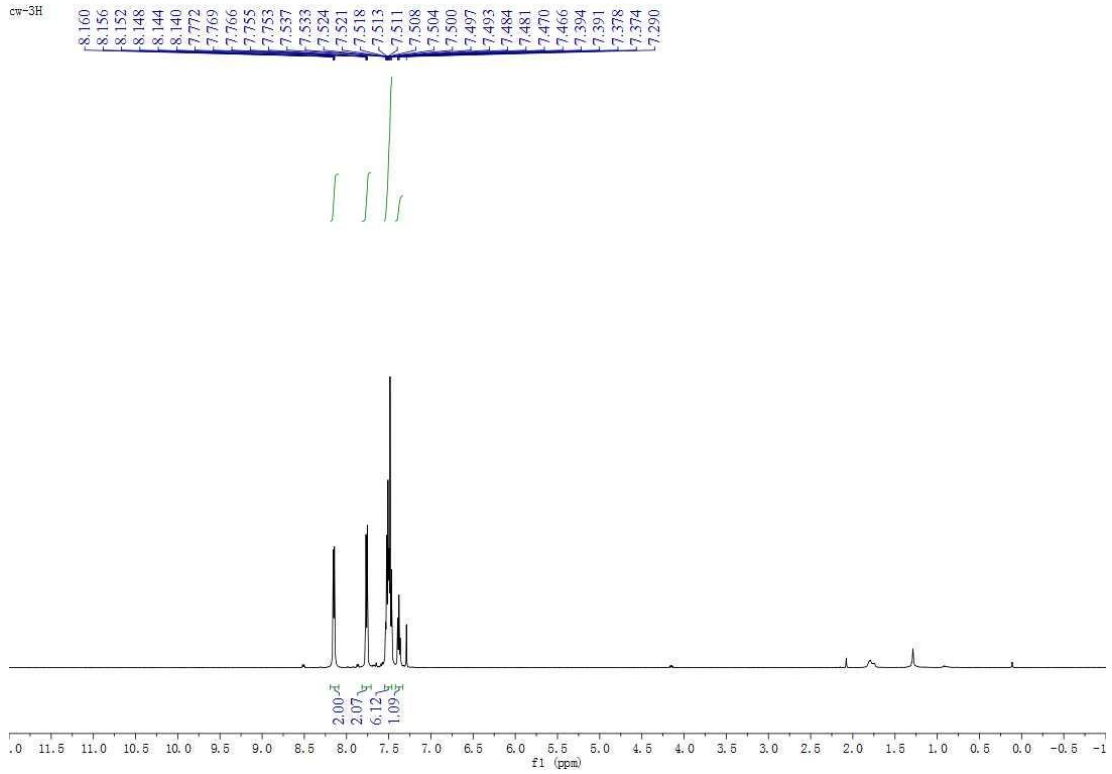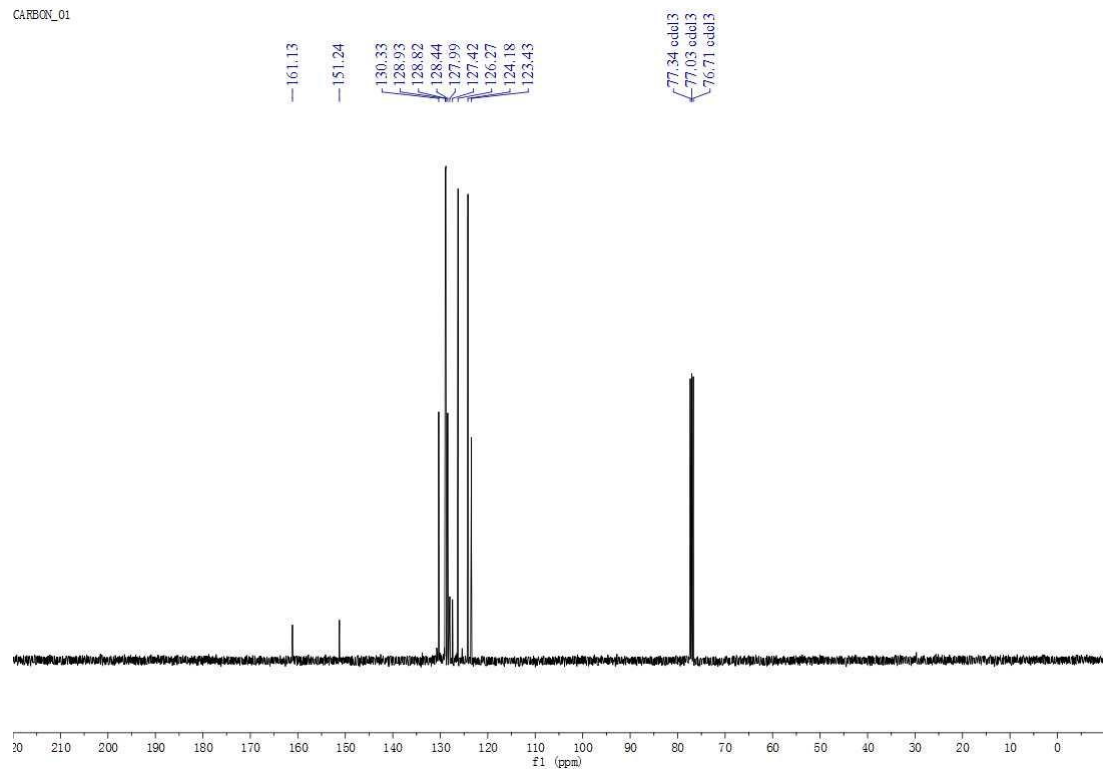

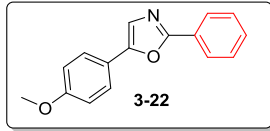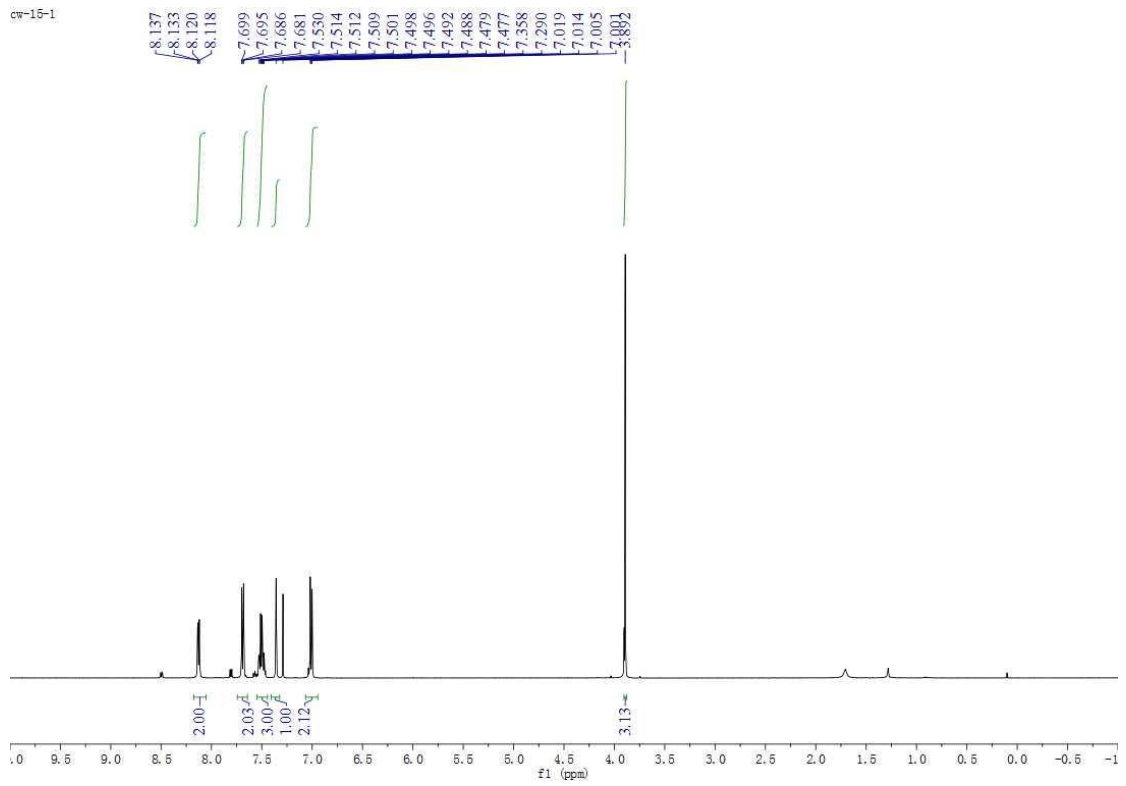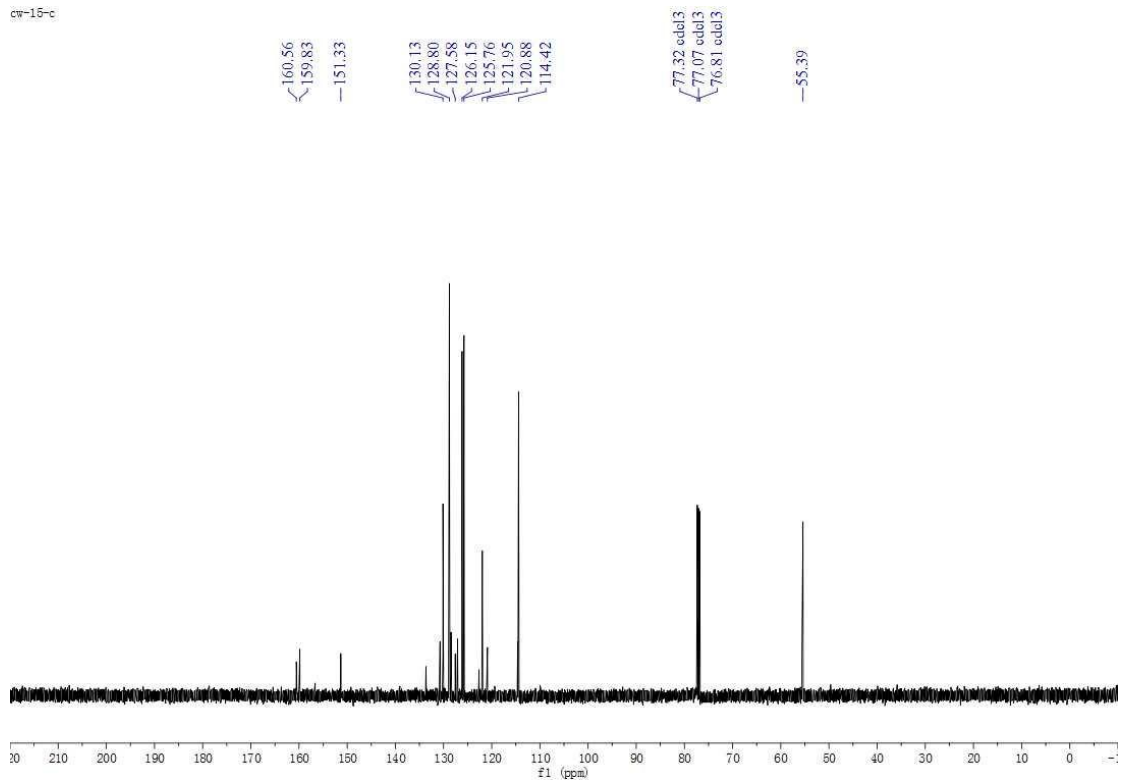

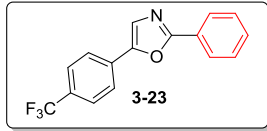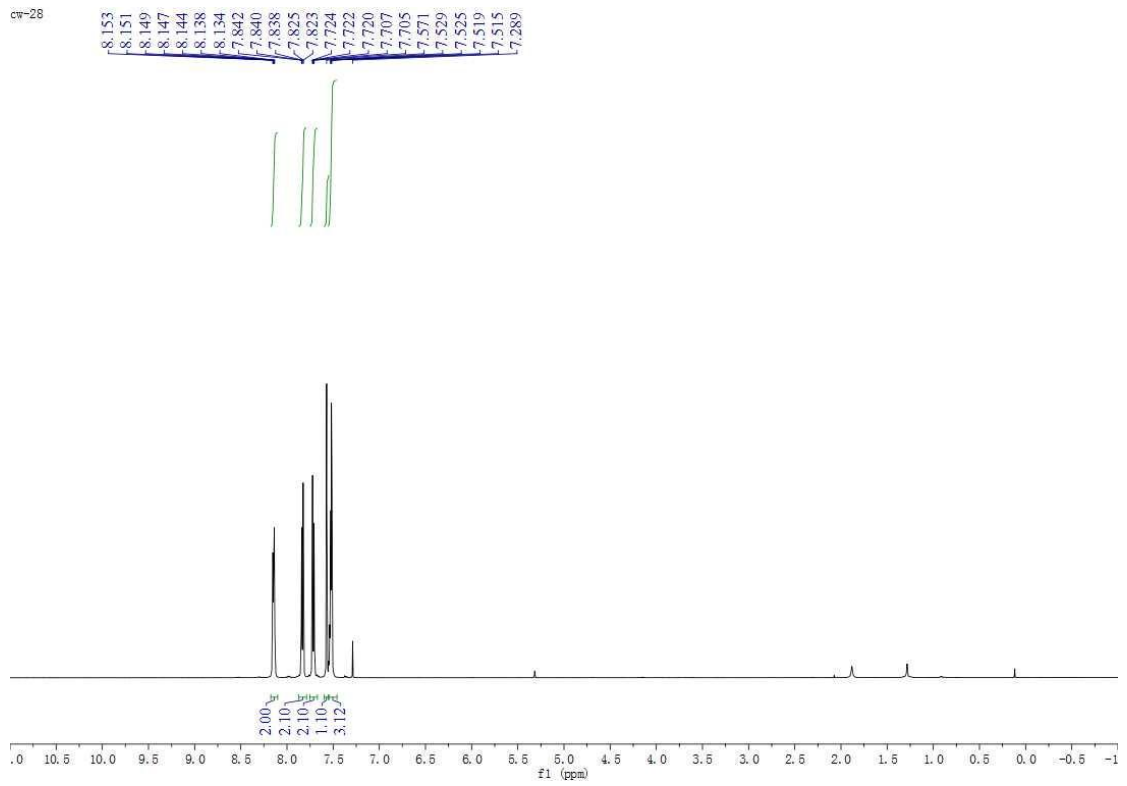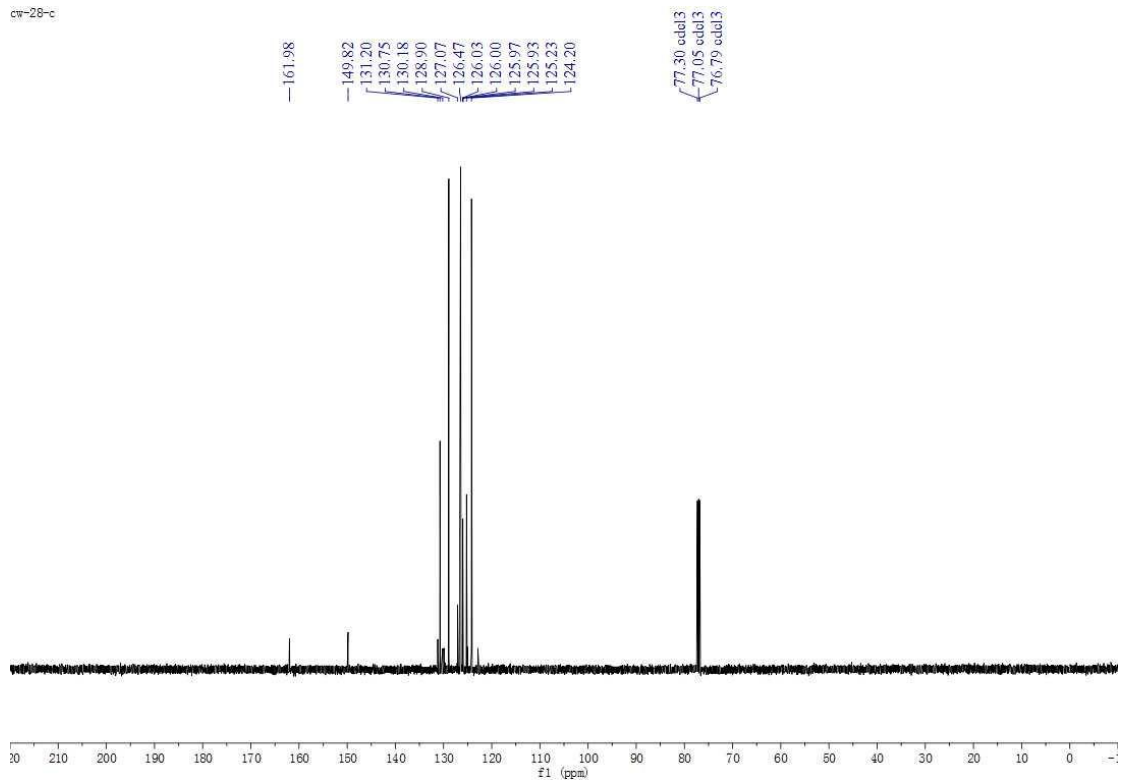

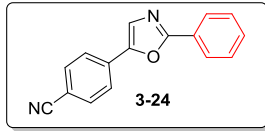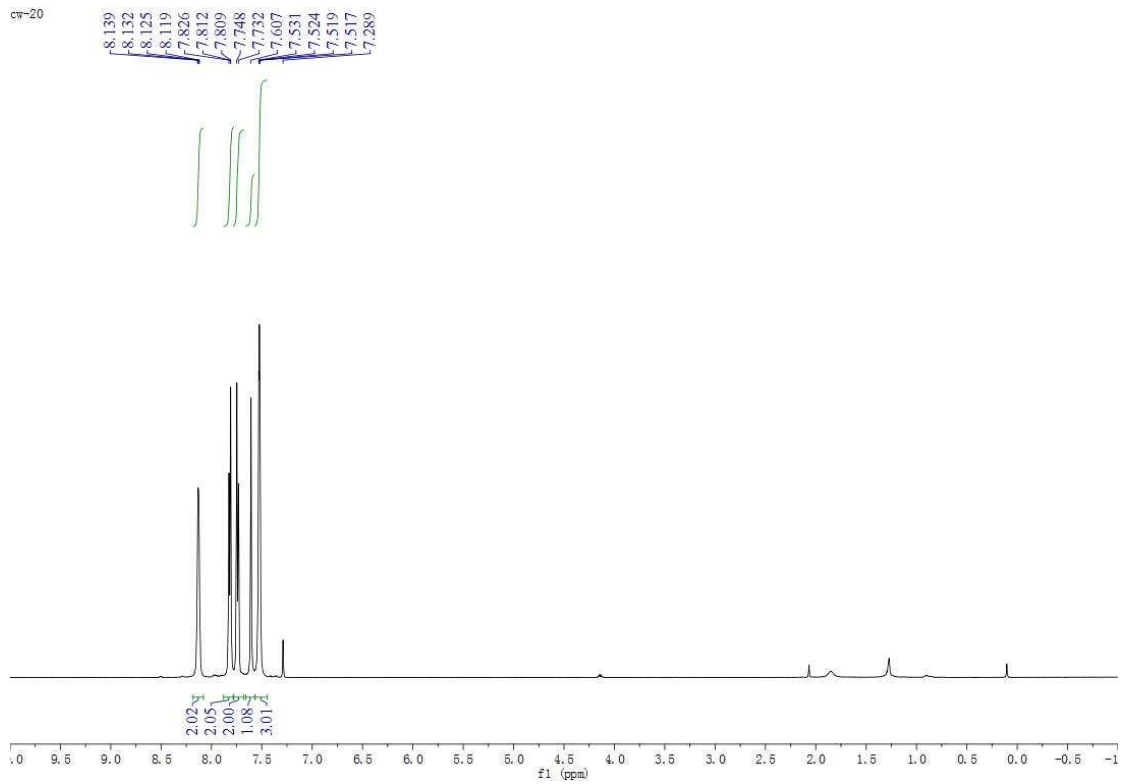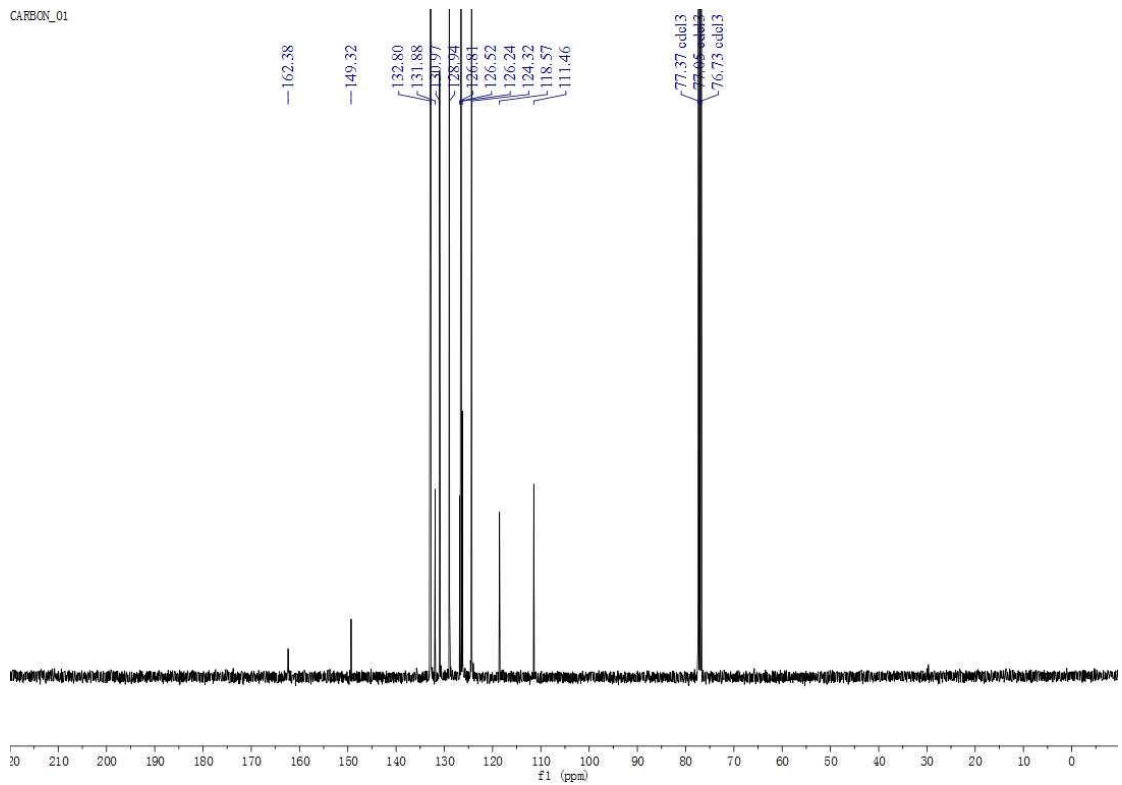

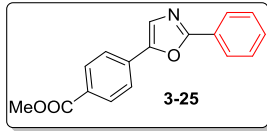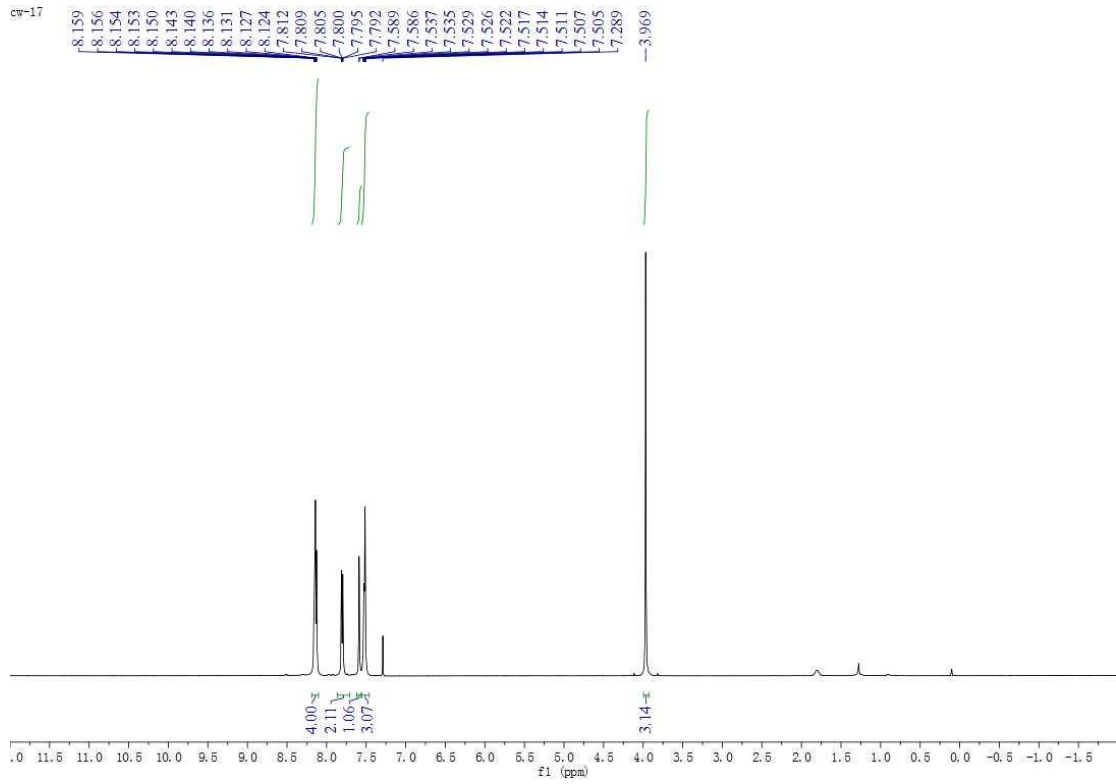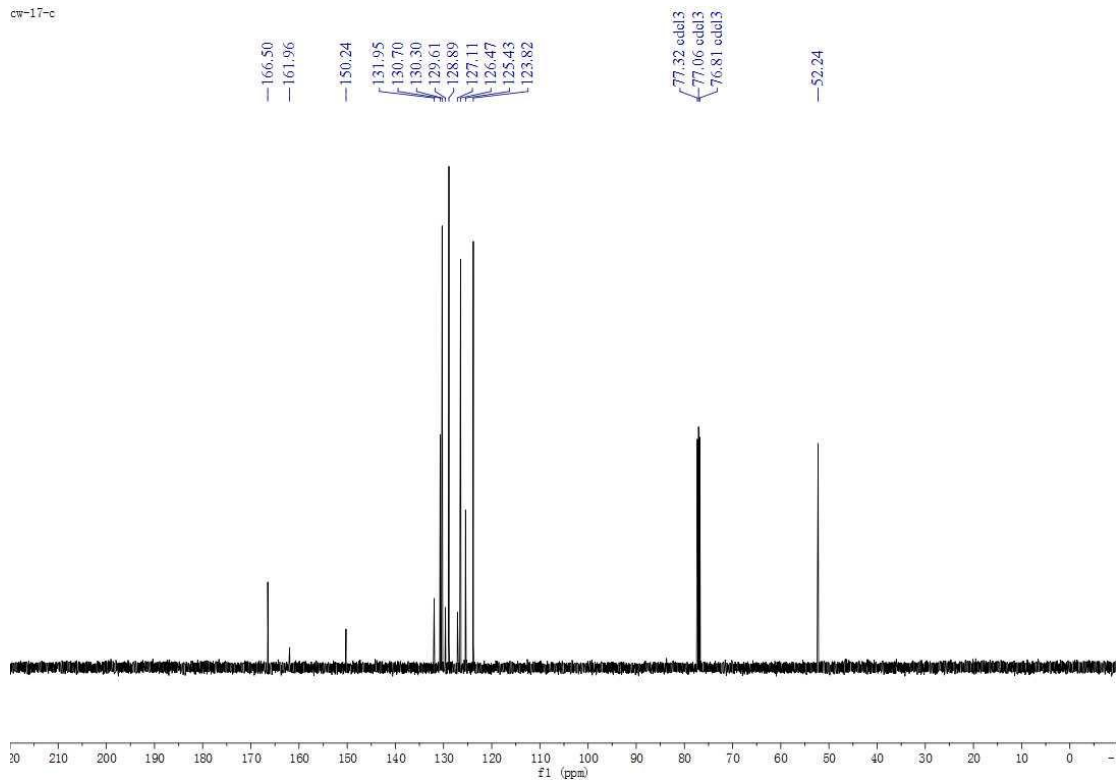





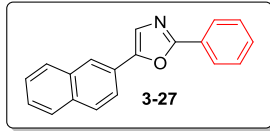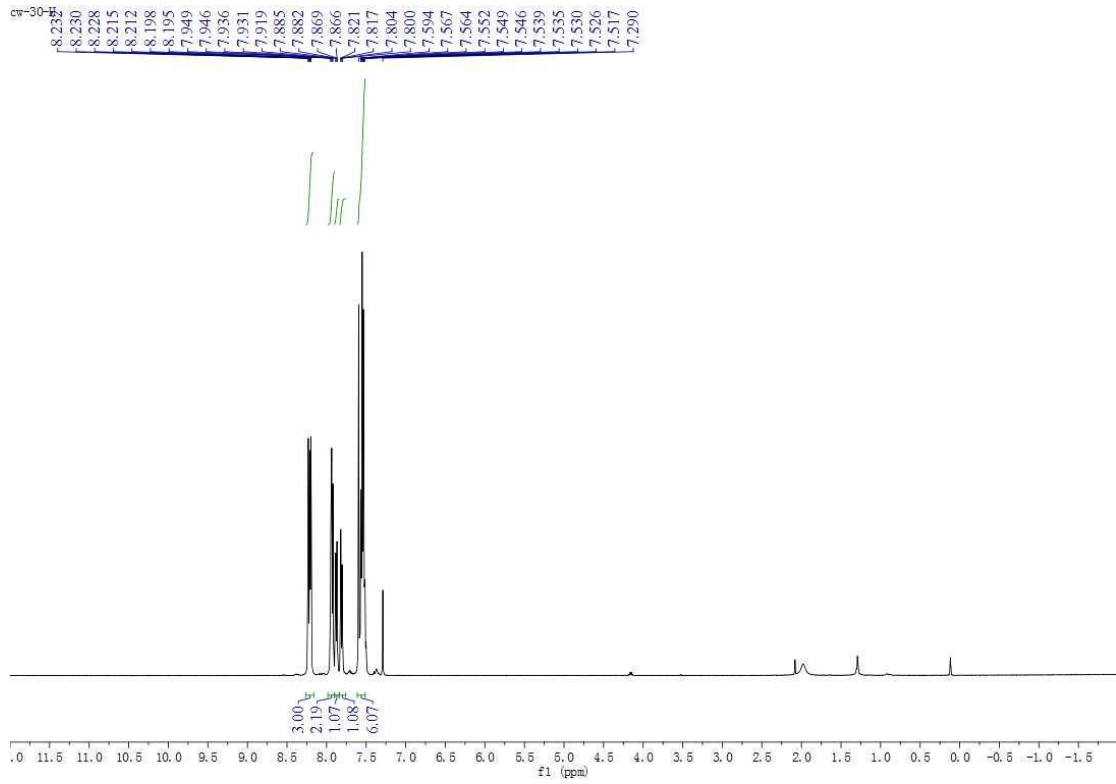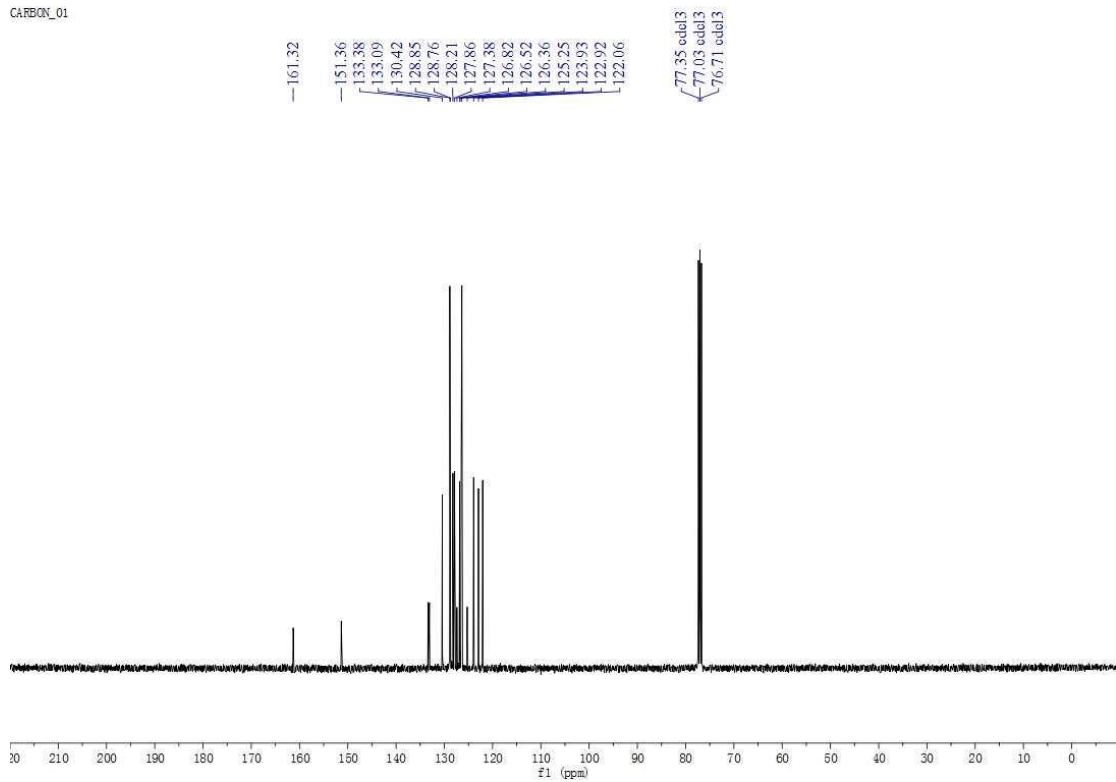

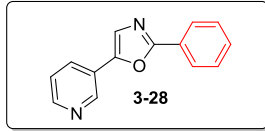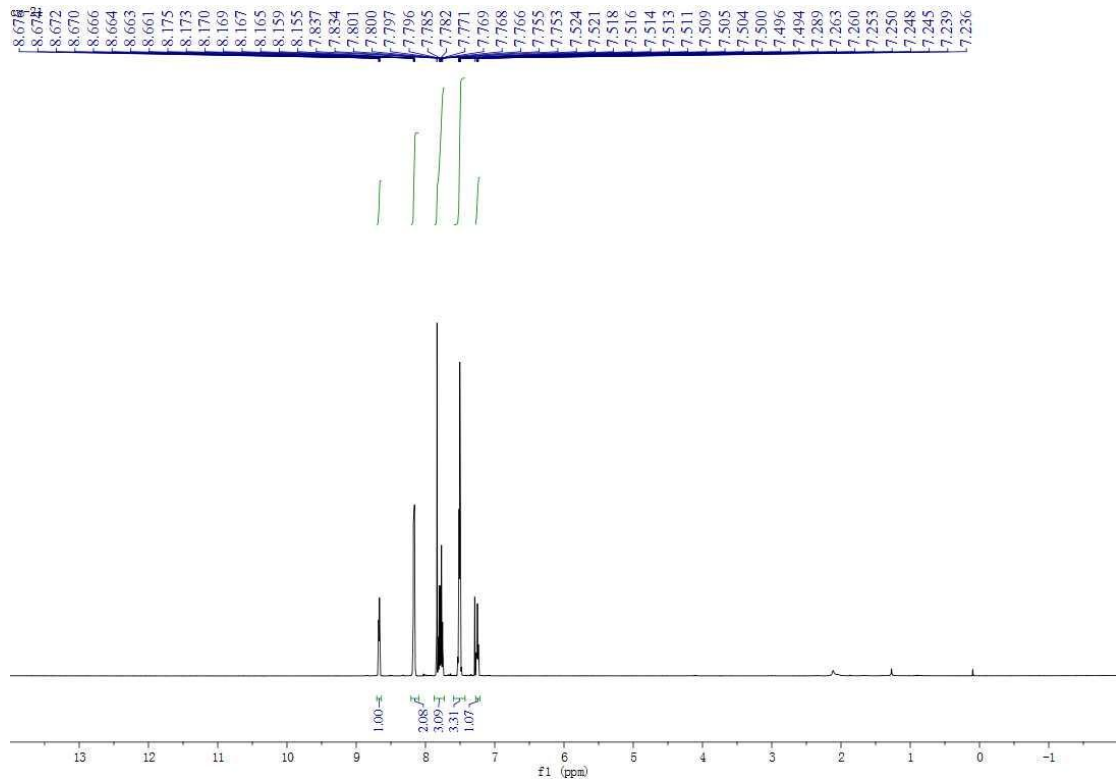

cw-21-c

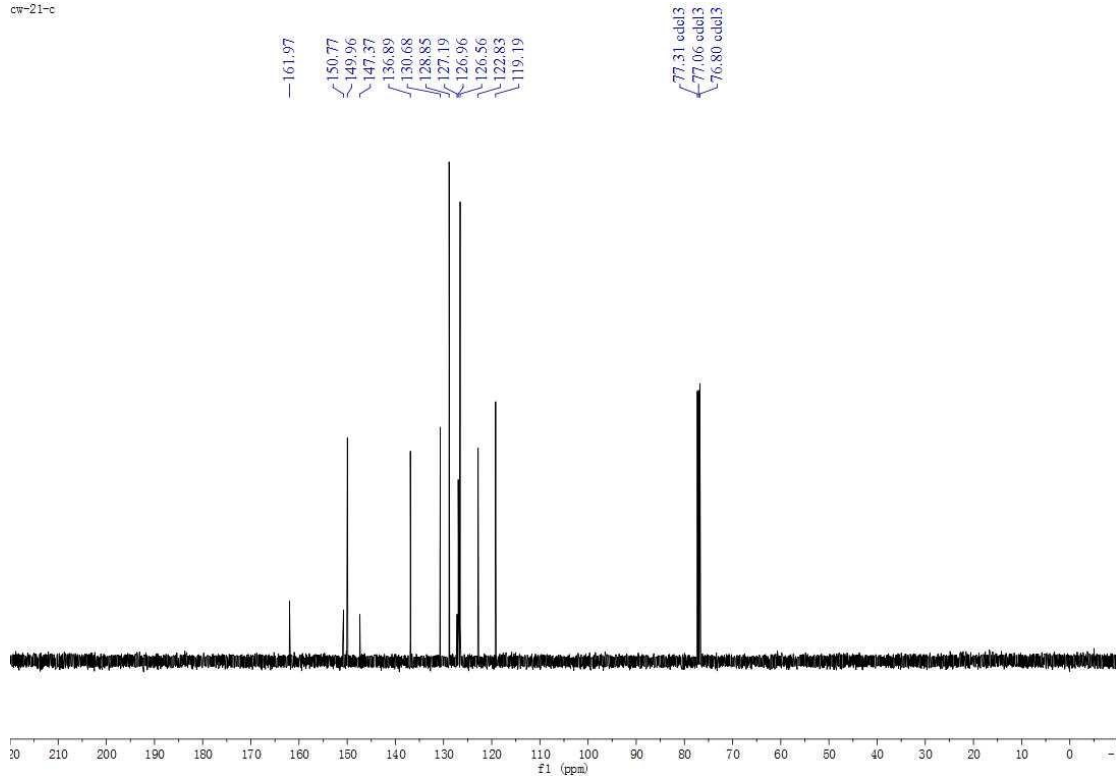

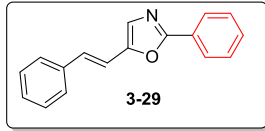

cw-29-again

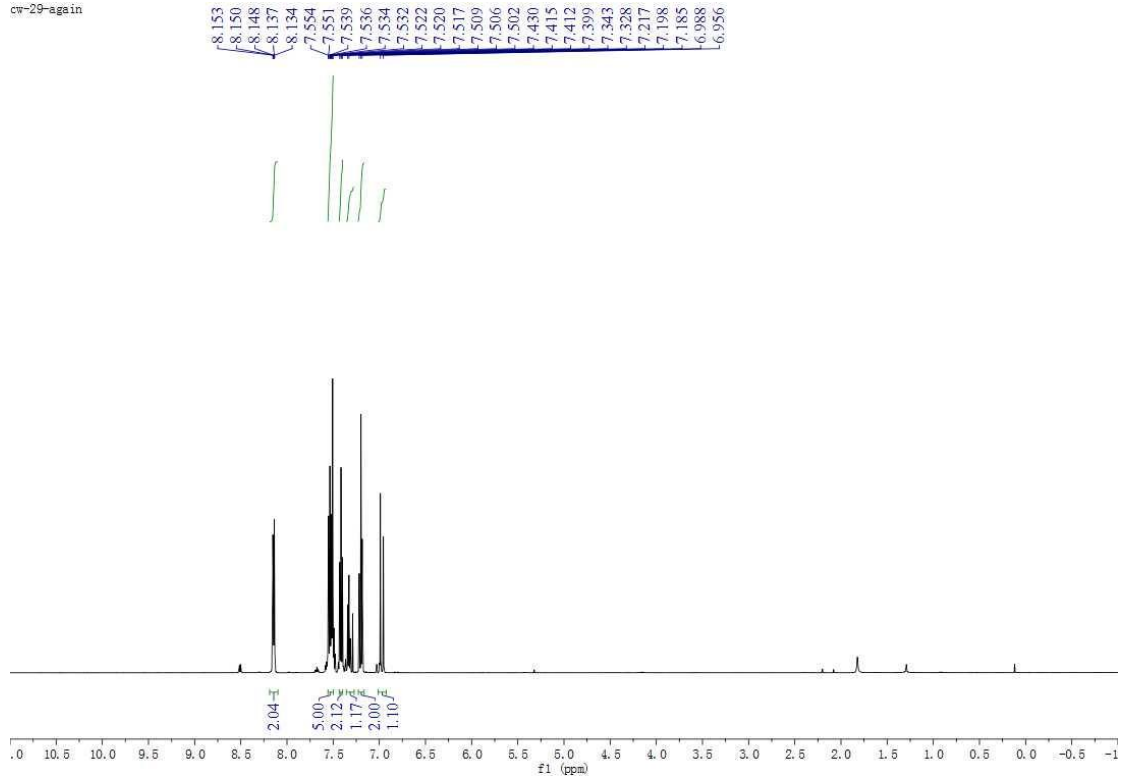

cw-29-c

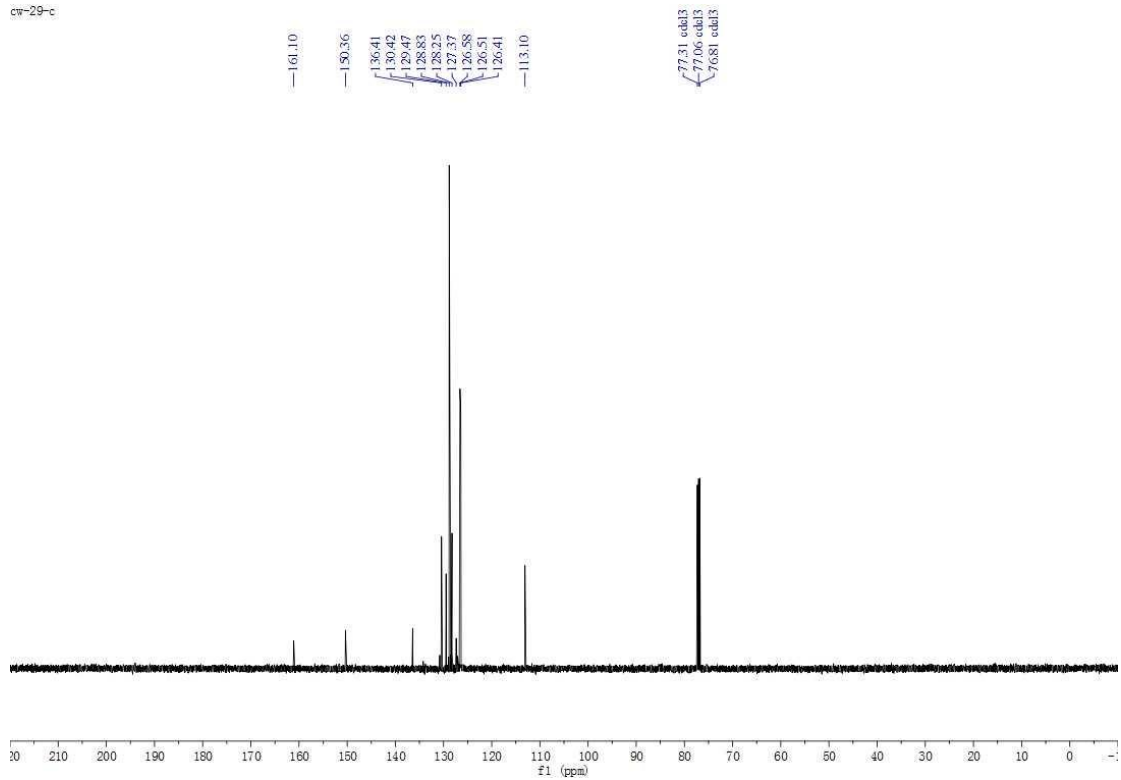

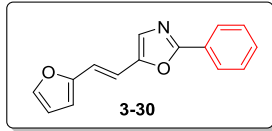

01-31-h

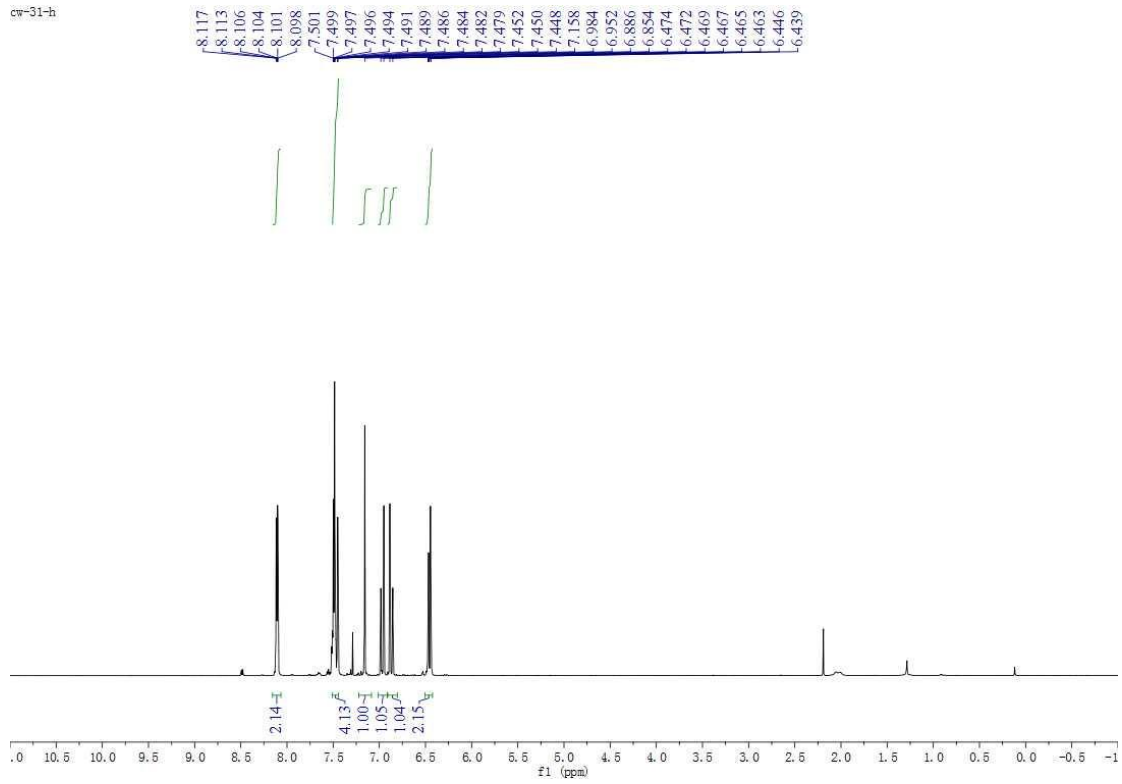

01-31-c

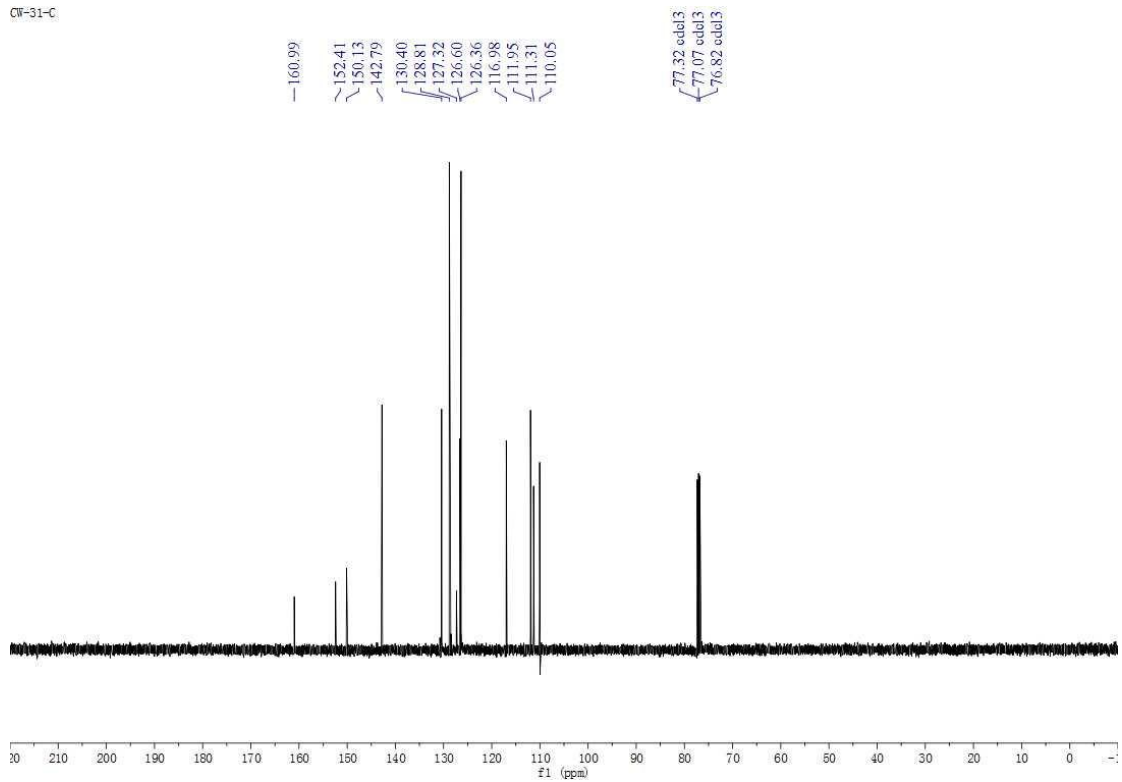

Supplement: c9qo00106a1.pdf [file c9qo00106a1.pdf]
